# Supplementary material for: How long has NICE taken to produce Technology Appraisal guidance? A retrospective study to estimate predictors of time to guidance
Source: PubMed Central journal article supplement — BMJ Open. 2013 Jan 11;3(1):e001870. doi: 10.1136/bmjopen-2012-001870 (PMC3549260; doi:10.1136/bmjopen-2012-001870), 2013-01-11
Supplement: bmjopen-2012-001870.draft_revisions.pdf [file bmjopen-2012-001870.draft_revisions.pdf]

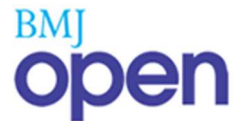

**How long has NICE taken to produce Technology Appraisal guidance? A retrospective study to estimate predictors of time to guidance.**

|                                 |                                                                                                                                                                                                                       |
|---------------------------------|-----------------------------------------------------------------------------------------------------------------------------------------------------------------------------------------------------------------------|
| Journal:                        | <i>BMJ Open</i>                                                                                                                                                                                                       |
| Manuscript ID:                  | bmjopen-2012-001870                                                                                                                                                                                                   |
| Article Type:                   | Research                                                                                                                                                                                                              |
| Date Submitted by the Author:   | 26-Jul-2012                                                                                                                                                                                                           |
| Complete List of Authors:       | Casson, Steven; London School of Hygiene and Tropical Medicine, Ruiz, Francis; National Institute for Health and Clinical Excellence, NICE International Miners, Alec; London School of Hygiene and Tropical Medicine |
| <b>Primary Subject Heading</b>: | Health economics                                                                                                                                                                                                      |
| Secondary Subject Heading:      | Health policy, Pharmacology and therapeutics, Public health, Evidence based practice                                                                                                                                  |
| Keywords:                       | HEALTH ECONOMICS, Health policy < HEALTH SERVICES ADMINISTRATION & MANAGEMENT, Protocols & guidelines < HEALTH SERVICES ADMINISTRATION & MANAGEMENT, PUBLIC HEALTH, STATISTICS & RESEARCH METHODS                     |
|                                 |                                                                                                                                                                                                                       |

SCHOLARONE™  
Manuscripts

only

## How long has NICE taken to produce Technology Appraisal guidance? A retrospective study to estimate predictors of time to guidance

Steven G Casson MA(Cantab) MB BChir MSc MFPH<sup>1</sup>, Francis Ruiz BSc MSc<sup>2</sup>, Alec Miners BA MSc

PhD<sup>3</sup>,

<sup>1</sup> SpR in Public Health, London School of Hygiene and Tropical Medicine, Keppel Street, London WC1E

7HT, UK.

<sup>2</sup> Senior Adviser (Health Economics), NICE International, National Institute for Health and Clinical

Excellence, 71 High Holborn, London WC1V 6NE

<sup>3</sup>Lecturer in Health Economics, Faculty of Public Health and Policy, London School of Hygiene and

Tropical Medicine, Keppel Street, London WC1E 7HT, UK.

### Address correspondence to:

s.casson@nhs.net

### Contents

- Word count of abstract, article summary, introduction, methods, results, discussion and references is 3317.
- Three tables.
- One figure
- 11 references.

## Funding

This research received no specific grant from any funding agency in the public, commercial or not-for-profit sectors. It was conducted as part of an MSc degree at the LSHTM.

## Declaration of Competing Interests

SC has no relationship with NICE. AM is a current member of one of NICE's Technology Appraisal Committee's and its Technology Appraisals' Decision Support Unit. FR is a member of NICE International, a not-for-profit consultancy service within NICE. FR, SC and AM have no other non-financial interests that may be relevant to the submitted work.

## Ethics Statement

This project did not involve any human subjects or any human data. Therefore ethics approval was not required.

## Contributors

SC collected, processed, and analysed the data and drafted the paper. AM conceived the subject for study, provided expert opinion on methodology / approach, contributed to the statistical analysis and helped write the text. FR contributed to the writing and discussion. AM is the guarantor.

## Acknowledgements

Nina Pinwill, Associate Director at NICE, advised on appraisal processes and time point suitability for analysis, and provided the missing data described in the text.

## Data sharing

No further data available.

## Abstract

**Objectives:** To assess how long the UK's National Institute for Health and Clinical Excellence's (NICE) Technology Appraisal Programme has taken to produce guidance and to determine independent predictors of time to guidance.

**Design:** Retrospective survival analysis.

**Setting:** Technology Appraisal's guidance produced by NICE.

**Datasource:** All appraisals referred to NICE by February 2010 were included, except those referred prior to 2001 and a number of those that were suspended.

**Outcome measure:** Duration from the start of an appraisal (when the scope document was released) until publication of guidance.

**Results:** Single Technology Appraisals (STAs) were published significantly faster than Multiple Technology Appraisals (MTAs) with median durations of 48.0 (interquartile range [IQR]; 44.3 to 75.4) and 74.0 (IQR; 60.9 to 114.0) weeks respectively ( $p < 0.0001$ ). Median time to publication exceeded published process timelines, even after adjusting for appeals. Results from the modelling suggest that STAs published results significantly faster guidance than MTAs after adjusting for other covariates (by 36.2 weeks [95% CI -46.05 to -26.42 weeks]) and that appeals against provisional guidance significantly increased the time to publication (by 42.83 weeks [95% CI 35.50 to 50.17 weeks]). There was no evidence that STAs of cancer-related

1  
2  
3 technologies took longer to complete compared with STAs of other technologies after adjusting  
4  
5 for potentially confounding variables and only weak evidence suggesting that the time to  
6  
7 produce guidance is increasing each year (by 1.40 weeks [95% CI -0.35 to 2.94 weeks]).  
8  
9

10  
11 **Conclusions:** The results from this study suggest that the STA process has resulted in  
12  
13 significantly faster guidance compared with the MTA process irrespective of topic but that these  
14  
15 gains are lost if appeals are made against provisional guidance. While NICE processes  
16  
17 continue to evolve over time, a trade off might be that decisions take longer but at present there  
18  
19 is no evidence of a significant increase in duration.  
20  
21  
22  
23  
24  
25  
26

## 27 Article summary

### 28 Article focus

- 29 • How long has NICE's Technology Appraisals taken to produce guidance?
- 30 • What features of an appraisal independently predict the time to publication of guidance?

### 31 Key messages

- 32 • The STA process has reduced the time to publication by about 36 weeks irrespective of topic.
- 33 • Appeals against final appraisal determinations have more than doubled the time it takes for STAs  
34 to conclude. No other factors were strongly predictive of the time to guidance.
- 35 • No variables predicting the likelihood of an appeal were identified.

### 36 Strengths and limitations of this study

- 37 • Use of survival analysis is a significant improvement on previous studies addressing the primary  
38 question.
- 39 • Time to guidance is not in itself an indicator of the 'quality' of decision.
- 40 • Other factors might also independently predict the time to guidance, such as consideration of  
41 patient access schemes and the number of consultees on each appraisal.

## Introduction

In England and Wales, the primary role of National Institute for Health and Clinical Excellence's (NICE's) Centre for Health Technology Evaluation is to produce guidance on the appropriate use of technologies for the NHS. Prior to 2005 all appraisals were undertaken using its Multiple Technology Appraisal (MTA) process [1]. However, following criticism of the slow production of guidance [2], [3], NICE established the Single Technology Appraisal (STA) process in 2005 with the objective of producing faster guidance closer to the time of product launch [4, 5]. Precise details of both processes can be found elsewhere [1, 6] but the STA is largely similar to the MTA but focuses on a single technology rather than a broader set, as its name implies, and the independent assessment of the evidence is restricted to a critique of the manufacturers submission rather than including a de novo systematic review and economic evaluation; it has been likened to the process used by the Scottish Medicine's Consortium [8]. STA adoption has been rapid, increasing from 13% of all technology appraisals in June 2008 to 43.4% by February 2010.

STAs and MTAs should in theory take 43 and 60 weeks respectively to conclude in the absence of an appeal against the provisional guidance (more formally known as a 'final appraisal determination'). A number of studies have attempted to assess whether the processes have met these targets and whether the STA process has resulted in faster guidance [7-9]. For example, Ford et al suggests that the STA has reduced the time to produce guidance, but not for cancer-related technologies [8]. O'Neil also suggests that the STA has reduced the average time to guidance, by approximately 1 year [9]. However, both analyses are limited. First, Ford only considers the time from product launch to guidance, rather than from the time NICE is formally requested to appraise a technology by the Department of Health; NICE only 'controls' the latter to some extent. Second, the studies only include completed appraisals; no adjustments were made for ongoing, and potentially lengthy, assessments meaning the results

1  
2  
3 could be biased. Last, while Ford and O'Neill attempted to identify independent predictors of  
4  
5 the time to guidance, none assessed these using formal statistical approaches for time to event  
6  
7 data and no attempts were made to formally identify the individual contribution of each  
8  
9 explanatory variable to the total time. The purpose of this study is to address all of these  
10  
11 issues.  
12  
13  
14  
15  
16  
17  
18  
19  
20  
21  
22  
23  
24  
25  
26  
27  
28  
29  
30  
31  
32  
33  
34  
35  
36  
37  
38  
39  
40  
41  
42  
43  
44  
45  
46  
47  
48  
49  
50  
51  
52  
53  
54  
55  
56  
57  
58  
59  
60

For peer review only

## Methods

### Inclusion criteria

All appraisals referred to NICE by Feb 2010 were considered for inclusion. However, MTAs prior to 2001 were excluded as they followed a different process to more recent MTAs . Appraisals were also excluded (19 STAs and 7 MTAs) if they had been suspended or postponed following initial referral from the Department of Health but before NICE issued the final scope document. For example, the Institute was asked to assess the cost-effectiveness of 'faller's clinics' for elderly individuals. However, the appraisal was stopped before consultees were asked to submit evidence as the difficulties of defining an intervention became clear.

### Key dates, durations and data sources

Data for the analysis was taken from NICE's website. A small amount of missing data (comprised of 21 start dates, 6 suspension dates, 4 appeal announcement dates, and 6 process types i.e. MTA or STA) was provided directly by NICE on request. The 'core' appraisal time period was bounded as follows. Start dates were calculated for the majority of appraisals using the *'final scope'* date, as this was the earliest consistently-recorded time point available throughout the whole dataset; this is also in line with when NICE 'starts the clock'. Scope documents include information on the intervention(s) to be evaluated and the relevant comparator programmes, and can be viewed as a formal appraisal start date for the purposes of inviting and constructing evidenced based submissions. Where this date was unknown (for 1 STA and 6 MTAs), the start date was inferred using the *'closing date for submissions to appraisal process by consultees'*. This time point is scheduled to occur at week 9 in the STA process or week 14 for a MTA. Subtraction of the relevant number of weeks (9 or 14) allowed the start of the core process to be inferred.



## Statistical analysis

The data effectively represent 'to time to an event', meaning it was analysed using survival analysis techniques with the 'event' being publication of guidance. Time to publication was initially assessed using Kaplan-Meier (KM) techniques, stratified by the parameter of interest (eg. STA / MTA process). Statistical significance was estimated using the log-rank test. The end (censor) date was taken to be the date final guidance was published, the date an appraisal was suspended or 13<sup>th</sup> February 2010, whichever occurred first. Rather than use Cox proportional hazard models to adjust KM results for multiple independent parameters, parametric techniques were instead used. This was because the latter is able to generate predictions of time to publication of guidance for censored events and to provide direct estimations of the independent contribution of each predictive variable to the total time to guidance (ie. the marginal effect). For example, the number of weeks an appeal has added to the length of a MTA or STA can be calculated, all other factors held constant. A number of different parametric survival models were fitted to the data including exponential, Weibull, lognormal, loglogistic, Gompertz and gamma. The model that minimised Akaike's information criterion (AIC) was selected for use. Sensitivity analysis was also used to assess the effect of using alternative parameteric model forms. Additionally, logistic regression was used to identify assess whether a number of independent variables predicted the likelihood of an appeal. The proportion of appraisals completing within anticipated process times (43 and 60 weeks for STAs and MTAs) were assessed by assuming a binomial distribution. All analyses were undertaken using STATA v12.

## Choice of independent variables

The choice of appraisal process (STA or MTA) was an obvious parameter for inclusion, since STAs are designed to be shorter than MTAs. Other parameters were identified using existing

1  
2  
3 literature and consideration of the underlying processes. For example, it is logical that an  
4 appeal against provisional guidance could add substantially to the time it takes to publish final  
5 guidance. Other authors have also suggested that cancer appraisals are typically more  
6 complex and 'controversial', given that they tend to be associated with high incremental cost-  
7 effectiveness ratios, meaning they take longer to complete. NICE considers revising published  
8 appraisal guidance every 1-3 years. Given that in theory these revisions should be adding to an  
9 existing evidence base, it was suspected that they might take a shorter time to complete  
10 compared with other appraisals. O'Neill suggested that there was no evidence that appraisals  
11 are generally taking longer to complete, a so called 'time-trend'. However, they also suggest  
12 that this conclusion should be revisited [using more formal statistical approaches].  
13  
14  
15  
16  
17  
18  
19  
20  
21  
22  
23  
24  
25  
26

27 For these reasons, the following independent variables were included in the survival analysis  
28 and logistic regression analysis: review of existing appraisal (yes / no), drug (yes / no), cancer-  
29 related topic (yes / no), whether an appeal on the final appraisal determination (yes / no),  
30 calendar year of appraisal start (2001 to 2010) and an interaction term between STA and cancer  
31 to test whether there was a difference between cancer-related and remaining STAs.  
32  
33 Other parameters were considered for inclusion, some of which had previously been studied,  
34 such as consideration of patient access schemes, guidance that ultimately restricted the use of  
35 a technology and the number of groups (consultees) who were formally engaged with an  
36 appraisal. However, they were ultimately rejected from the final model because of difficulties in  
37 consistently collecting this evidence. For example, a number of patient access schemes have  
38 been submitted to NICE, but only more recently has this become a formal part of NICE's  
39 appraisal processes.  
40  
41  
42  
43  
44  
45  
46  
47  
48  
49  
50  
51  
52

53 The basic tested hypothesis was that none of the independent parameters independently  
54 predicted the time to publication of guidance.  
55  
56  
57  
58  
59  
60

## Results

Data was collected on 196 appraisals, 80 STAs and 116 MTAs that started between 2001 and 2010 (Table 1). All but one STA appraised the use of drugs, and almost 40% of all appraisals were cancer-related. Approximately half of the STAs had been published (39/80) by the time of analysis, as had 84% (97/116) of the MTAs. Over 20% (45/196) of the appraisals included at least one appeal and 15% (29/196) were reviews of existing guidance.

The estimates of process length for completed STAs (published on time: 9/39 = 23%,  $p=0.001$ ) and MTAs (19/97 = 20%,  $p<0.001$ ) exceeded NICE's timetabled targets of 43 and 60 weeks respectively with corresponding median times of 45.4 (IQR 43.3 to 55.9) and 69.6 weeks (IQR 60.9 to 111.1). The proportion of appraisals from both processes continued to exceed published timelines after removing appraisals containing appeals ( $p<0.01$  in both instances), although the median times were much closer to target levels (STA median 44.8 weeks IQR, 42.3 to 48.0; MTA median 61.6 weeks IQR 57.7 to 71.1).

Results from the KM analysis showed that production of guidance was significantly faster for STAs than for MTAs; the median time to guidance was 48.0 weeks (interquartile range [IQR] 44.3 to 75.4) and 74.0 weeks (IQR; 60.9 to 114.0) for the STA and MTA processes respectively ( $p\text{-value}<0.0001$ , Figure 1). Further stratified analysis (Table 2) suggested that appeals significantly extended the time to guidance for both MTAs and STAs ( $p<0.001$ ), and that cancer-related STAs were significantly longer compared with non-cancer STAs ( $p=0.02$ ). None of the remaining comparisons were statistically significant.

Results from the multivariate parametric modelling suggested that the loglogistic model was the most appropriate to use. STA and appeals were shown to be associated with faster and slower

1  
2  
3 times to guidance respectively (Table 3). None of the remaining variables were significantly  
4  
5 associated with the time to guidance although there was weak evidence of a yearly increase in  
6  
7 the time it has taken to publish guidance (1.40 weeks [95% CI -0.35 to 2.94 weeks]). Sensitivity  
8  
9 analysis using different distributional forms had negligible effects on the results. None of the  
10  
11 covariates were found to be predictive of the likelihood of an appeal (data not shown).  
12  
13  
14  
15  
16  
17  
18  
19  
20  
21  
22  
23  
24  
25  
26  
27  
28  
29  
30  
31  
32  
33  
34  
35  
36  
37  
38  
39  
40  
41  
42  
43  
44  
45  
46  
47  
48  
49  
50  
51  
52  
53  
54  
55  
56  
57  
58  
59  
60

For peer review only

## Discussion

The results from this analysis show that NICE's STA process produced much faster guidance to the NHS compared with the MTA process, by about 35 weeks. But appeals against provisional guidance, when they occurred, more than offset this gain. The results from the KM analysis suggested that cancer-related STAs were longer than non-cancer STAs. However, the difference was no longer statistically significant when adjustments were made for other variables. The evidence that each year appraisal length is independently increasing is weak at best (increase of 1.40 weeks [95% CI -0.35 to 2.94 weeks]). Variables indicating whether a technology was a drug or a review of existing guidance were not predictive of the time to guidance.

### How does this compare to other studies?

The percentages of MTAs and STAs completing within timetabled targets are consistent with those reported by O'Neill [9]. While the estimates of STA duration were also similar, the time taken to produce MTAs was not; O'Neill stated about 100 weeks whereas our unadjusted estimate was nearer to 74 weeks indicating a much smaller difference between the two processes. It is possible that methodological differences could explain these findings. For example, MTAs appraise the use of more than one technology. O'Neill considered each technology within a MTA to represent a discrete decision thus an appraisal with three recommendations was effectively taken to be equivalent to three appraisals. In this study each appraisal was taken to represent a single event irrespective of the number of recommendations it contained. However, irrespective of the best approach, it should be noted that NICE clearly states published timelines represent a *minimum* amount of time to publication and that the median times were within 2 weeks of target levels when appraisals containing appeals were removed from our analysis.

1  
2  
3 O'Neill [9] reported that STAs were substantially faster than MTAs. Ford's [8] unadjusted  
4  
5 analysis also suggests that STAs have reduced the time to guidance compared with MTAs, but  
6  
7 not for STAs of cancer-related technologies. We agree with the general finding that the STA  
8  
9 has significantly reduced the time to guidance. However, while our unadjusted KM analysis also  
10  
11 suggests STAs of cancer-related technologies were slower to complete compared with their  
12  
13 non-cancer related counterparts, the difference was no longer significant when adjustments  
14  
15 were made for other variables, including appeals.  
16  
17  
18  
19

20  
21 Both O'Neill and Ford include analyses that estimate the time between product launch and  
22  
23 production of NICE guidance, presumably because a specific objective of the STA process is to  
24  
25 minimise this time period. Our analysis only used the point at which NICE issued its final scope  
26  
27 as the appraisal starting point. We elected not to use the time of product launch as in our  
28  
29 opinion the date is difficult to measure accurately and more importantly, it often has little  
30  
31 meaning. For example, guidance on the use of vinorelbine for advanced breast cancer (TA 54)  
32  
33 [10] was published in 2002, whereas its marketing authorisation was issued in 1997, two years  
34  
35 before NICE existed.  
36  
37  
38  
39

40 O'Neill et al cautiously stated that there was no evidence that either the STA or MTA have  
41  
42 increased in length over time. We agree with this conclusion.  
43  
44

### 45 **Strengths and limitations**

46  
47 The main strength of this analysis compared with previous studies is that it uses formal survival  
48  
49 analysis techniques to assess the time to publication of guidance, and in doing so, adjusts these  
50  
51 estimates for potentially confounding variables and generates estimates of the marginal  
52  
53 contribution of each variable to the total time. This said, there are a number of limitations. First,  
54  
55 the start of each appraisal was taken to be the time at which consultees are formally invited to  
56  
57  
58  
59  
60

1  
2  
3 submit evidence as this is point at which appraisals formally start; set as the time at which the  
4 final scope document is issued. However, NICE consults on scope documents, meaning that  
5 appraisals in some senses start about 3 months earlier; although there is no guarantee at this  
6 time that the appraisal will proceed. While including this extra time would increase the median  
7 to guidance, it is unlikely to alter the predictive value of the explanatory variables. Second, no  
8 account was taken of interruptions that were outside of NICE's control, such as public holidays  
9 or publication embargos during general elections; the latter can be lengthy. Third, MTAs usually  
10 result in guidance that relates to the use of more than one technology. In this analysis all  
11 appraisals have been treated as equal, in so much that no account has been made of the  
12 number of technologies being appraised. However, it is conceivable that one MTA of (say)  
13 three technologies could be shorter, in terms of calendar time, than three separate STAs,  
14 meaning that comparisons of the two processes should be treated with some caution. Fourth,  
15 there is a potential issue of endogeneity in the statistical analysis since it is possible that  
16 appeals are at least partly a result of the other independent variables. While this cannot be  
17 completely ruled out, none of the examined variables were independently predictive of an  
18 appeal, thus we think this issue is unlikely to be important. Lastly, while we have used time to  
19 guidance as a single outcome measure, other outcomes, such as 'quality' of the  
20 recommendations, are clearly also important.  
21  
22  
23  
24  
25  
26  
27  
28  
29  
30  
31  
32  
33  
34  
35  
36  
37  
38  
39  
40  
41  
42  
43  
44

## 45 **Conclusion and recommendation**

46  
47 In summary, the evidence suggests that despite the incorporation of more detailed methods and  
48 processes over the past decade, the time it has taken NICE to produce guidance over the past  
49 decade has not independently increased [11]. The introduction of the STA process has resulted  
50 in the production of significantly faster guidance to the NHS, irrespective of clinical topic.  
51  
52 However, appeals when they occur can significantly extend this time. We therefore recommend  
53  
54  
55  
56  
57  
58  
59  
60

1  
2  
3  
4  
5  
6  
7  
8  
9  
10  
11  
12  
13  
14  
15  
16  
17  
18  
19  
20  
21  
22  
23  
24  
25  
26  
27  
28  
29  
30  
31  
32  
33  
34  
35  
36  
37  
38  
39  
40  
41  
42  
43  
44  
45  
46  
47  
48  
49  
50  
51  
52  
53  
54  
55  
56  
57  
58  
59  
60

that where possible, efforts be made to develop working practices and processes which can reduce the need for them.

For peer review only



## References

1. National Institute for Health and Clinical Excellence, *Guide to the multiple technology appraisal process*, 2009.
2. Mayor, S., *NICE to issue faster guidance to the NHS*. *BMJ*, 2005. **331**: p. 1101.
3. Haycox, A., *Does 'NICE blight' exist, and if so, why?* *Pharmacoeconomics*. *Pharmacoeconomics*, 2008. **26**: p. 987-989.
4. NICE, *Guide to the single technology appraisal process*, 2009, National Institute for Health and Clinical Excellence,.
5. Wailoo, A. and C. Pickstone, *A Review Of The Nice Single Technology Appraisal Process*, 2008, School of Health and Related Research, University of Sheffield (Decision Support Unit),.
6. National Institute for Health and Clinical Excellence, *Guide to the single technology appraisal process*, 2009.
7. Barham, L., *Single Technology Appraisals by NICE -- are they delivering faster guidance to the NHS?* *Pharmacoeconomics*, 2008. **26**: p. 1037-43.
8. Ford, J.A., et al., *NICE guidance: a comparative study of the introduction of the single technology appraisal process and comparison with guidance from Scottish Medicines Consortium*. *BMJ Open*, 2012. **2**(1).
9. O'Neill, P., N. Devlin, and Puig-Peró, *Time trends in NICE HTA decisions*, in *Consulting report 2012*, Office of Health Economics: London.
10. National Institute for Health and Clinical Excellence. *Guidance on the use of vinorelbine for the treatment of advanced breast cancer*. Technology Appraisal Guidance 2002 01/01/2012]; Available from: <http://guidance.nice.org.uk/TA54>.
11. Mechanic, D., *Dilemmas in rationing health care services: the case for implicit rationing*. *BMJ*, 1995. **310**(6995): p. 1655-1659.

## Tables

Table 1: Appraisals included in the analysis (n=196)

| Variable                     | STA | MTA |
|------------------------------|-----|-----|
| n                            | 80  | 116 |
| Guidance published*          | 39  | 97  |
| Appraisal suspended*         | 8   | 14  |
| Appraisal of a drug or drugs | 79  | 73  |
| Appraisal cancer-related     | 47  | 29  |
| At least one appeal**        | 9   | 36  |
| Review                       | 3   | 26  |

\*at the time the analysis was undertaken

\*\*appeals are made by consultees (often the producer of the technology) against final appraisal determinations, that is, NICE's provisional guidance. See XX for further details.

Table 2. Results of Kaplan Meier analysis (weeks), log-rank tests of equality of survivor functions

| Strata            | MTA n=116 |                       |         | STA n=80 |                      |         |
|-------------------|-----------|-----------------------|---------|----------|----------------------|---------|
|                   | N         | Median (IQR)          | p-value | N        | Median (IQR)         | p-value |
| <b>Cancer</b>     | 23        | 66.5 (60.6 to 111.1)  |         | 18       | 57.0 (42.3 to 87.9)  |         |
| <b>No Cancer</b>  | 74        | 74.0 (61.4 to 116.1)  | 0.43    | 21       | 45.4 (44.7 to 55.7)  | 0.02    |
| <b>Review</b>     | 17        | 68.4 (61.4 to 111.1)  |         | 1        | 44.1 (N/A)           |         |
| <b>Non review</b> | 80        | 74.0 (60.9 to 116.4)  | 0.65    | 38       | 51.0 (44.7 to 75.4)  | 0.18    |
| <b>Drug</b>       | 59        | 77.6 (62.4 to 116.3)  |         | 39       | 48.0 (44.3 to 75.4)  |         |
| <b>Non drug</b>   | 38        | 66.6 (57.7 to 91.8)   | 0.11    | 0        | N/A                  | -       |
| <b>Appeal*</b>    | 35        | 116.1 (91.9 to 136.9) |         | 7        | 76.7 (65.0 to 105.3) |         |
| <b>No appeal</b>  | 62        | 61.6 (57.7 to 71.1)   | <0.001  | 32       | 44.9 (42.3 to 48.0)  | <0.001  |

\*Indicates at least one appeal; IQR, interquartile range; N indicates observed events; N/A, not applicable

Table 3: Results from the loglogistic modelling

| Variable               | Coefficient | 95% CI         | p-value | Marginal effect<br>(weeks) <sup>†</sup> | 95% CI           |
|------------------------|-------------|----------------|---------|-----------------------------------------|------------------|
| <b>STA*</b>            | -0.49       | -0.62 to -0.36 | <0.001  | -36.2                                   | -46.05 to -26.42 |
| <b>Cancer*</b>         | -0.03       | -0.002 to 0.04 | 0.60    | -2.06                                   | -9.80 to 5.70    |
| <b>STA x cancer</b>    | 0.13        | -0.05 to 0.30  | 0.15    | 9.23                                    | -3.36 to 21.81   |
| <b>Drug*</b>           | 0.08        | -0.01 to 0.20  | 0.08    | 6.10                                    | -0.75 to 12.87   |
| <b>Review*</b>         | -0.04       | -0.12 to 0.07  | 0.43    | -3.26                                   | -11.39 to 4.87   |
| <b>Ever an appeal*</b> | 0.60        | 0.50 to 0.67   | <0.001  | 42.83                                   | 35.50 to 50.17   |
| <b>Year started**</b>  | 0.02        | -0.002 to 0.04 | 0.073   | 1.40                                    | -0.35 to 2.94    |
| <b>Ln_gamma</b>        | -2.06       | -2.20 to -1.91 | <0.001  | -                                       | -                |

Log likelihood = 2.23; constant = 4.04; \*yes = 1, no =0; \*\*where values range between (20)1 and (20)10;

<sup>†</sup>indicates the independent contribution to the median to time to publication;  $\beta$  values less than 0 indicate variables are associated with a shorter time to guidance; CI – confidence interval

## Figures

Figure 1. Kaplan-Meier survival estimate of time to publication of guidance

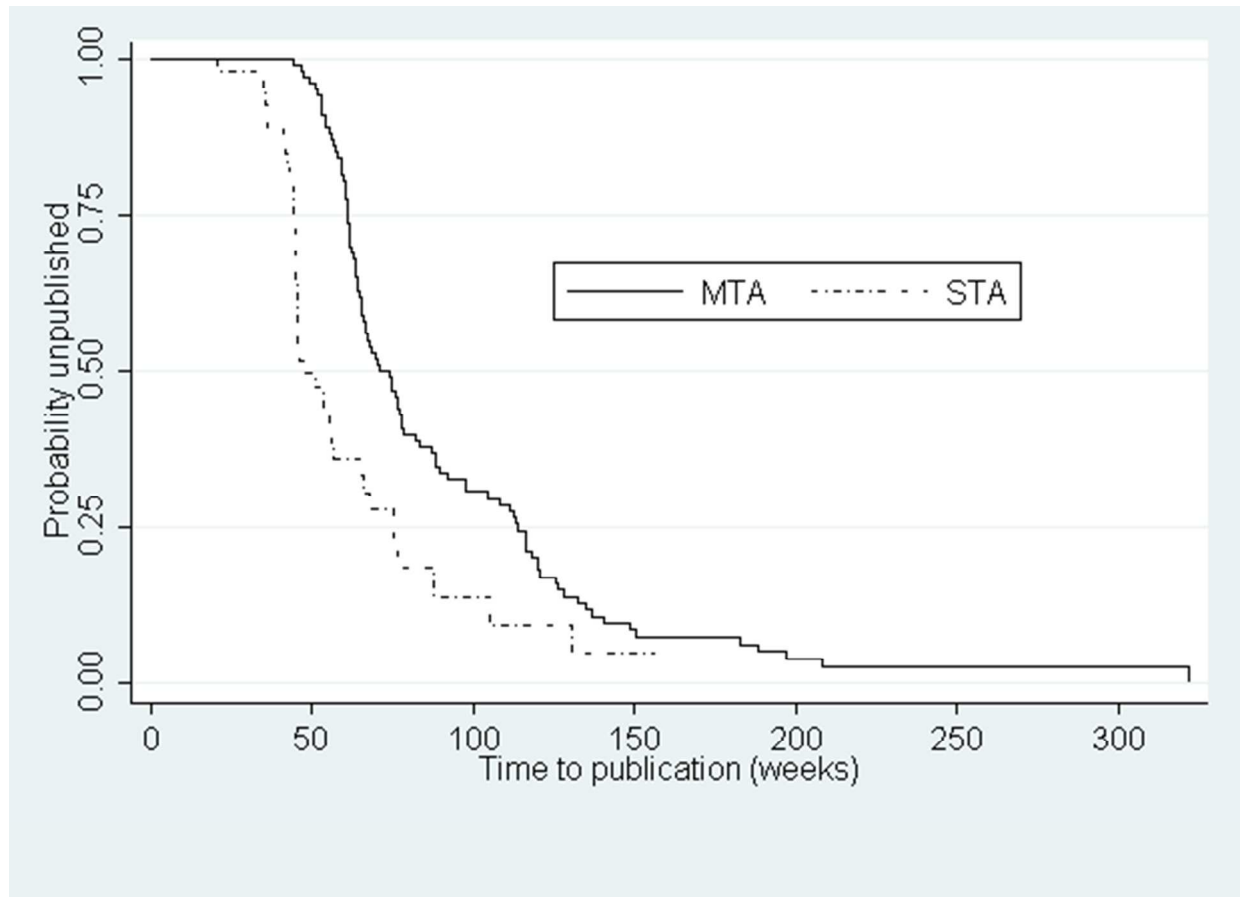

1  
2  
3  
4  
5  
6  
7  
8  
9  
10  
11  
12  
13  
14  
15  
16  
17  
18  
19  
20  
21  
22  
23  
24  
25  
26  
27  
28  
29  
30  
31  
32  
33  
34  
35  
36  
37  
38  
39  
40  
41  
42  
43  
44  
45  
46  
47  
48  
49  
50  
51  
52  
53  
54  
55  
56  
57  
58  
59  
60

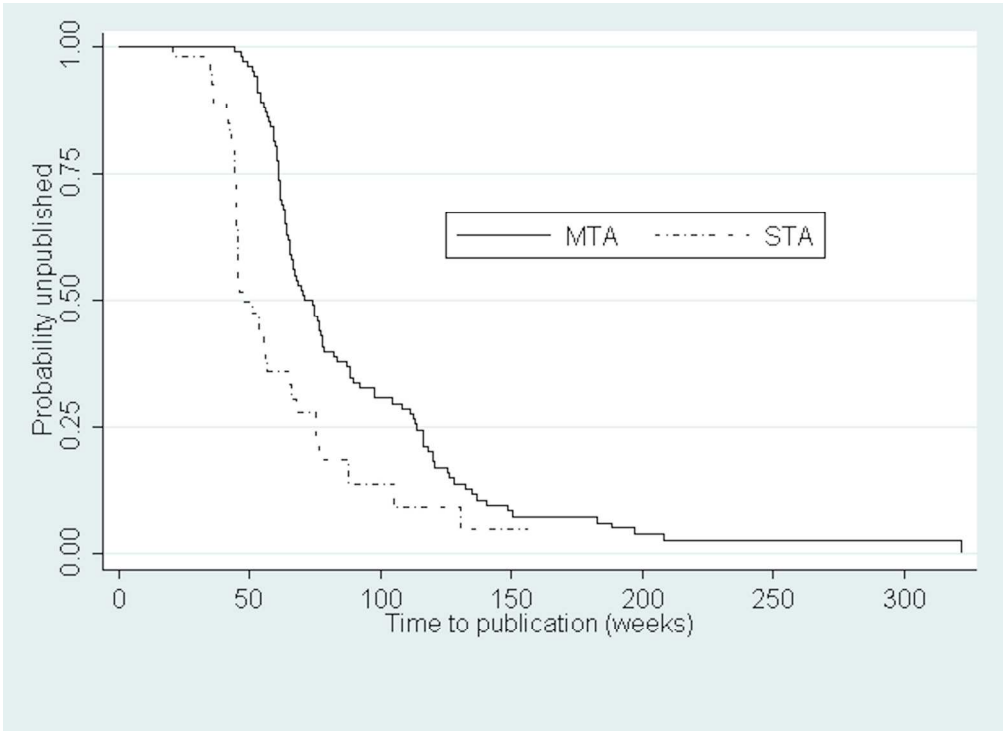

Figure 1. Kaplan-Meier survival estimate of time to publication of guidance.  
217x158mm (300 x 300 DPI)

view only



**How long has NICE taken to produce Technology Appraisal guidance? A retrospective study to estimate predictors of time to guidance.**

|                                 |                                                                                                                                                                                                                       |
|---------------------------------|-----------------------------------------------------------------------------------------------------------------------------------------------------------------------------------------------------------------------|
| Journal:                        | <i>BMJ Open</i>                                                                                                                                                                                                       |
| Manuscript ID:                  | bmjopen-2012-001870.R1                                                                                                                                                                                                |
| Article Type:                   | Research                                                                                                                                                                                                              |
| Date Submitted by the Author:   | 06-Nov-2012                                                                                                                                                                                                           |
| Complete List of Authors:       | Casson, Steven; London School of Hygiene and Tropical Medicine, Ruiz, Francis; National Institute for Health and Clinical Excellence, NICE International Miners, Alec; London School of Hygiene and Tropical Medicine |
| <b>Primary Subject Heading</b>: | Health economics                                                                                                                                                                                                      |
| Secondary Subject Heading:      | Health policy, Pharmacology and therapeutics, Public health, Evidence based practice                                                                                                                                  |
| Keywords:                       | HEALTH ECONOMICS, Health policy < HEALTH SERVICES ADMINISTRATION & MANAGEMENT, Protocols & guidelines < HEALTH SERVICES ADMINISTRATION & MANAGEMENT, PUBLIC HEALTH, STATISTICS & RESEARCH METHODS                     |
|                                 |                                                                                                                                                                                                                       |

SCHOLARONE™  
Manuscripts

only

# How long has NICE taken to produce Technology Appraisal guidance? A retrospective study to estimate predictors of time to guidance

Steven G Casson MA(Cantab) MB BChir MSc MFPH<sup>1</sup>, Francis Ruiz BSc MSc<sup>2</sup>, Alec Miners BA MSc

PhD<sup>3</sup>,

<sup>1</sup> SpR in Public Health, London School of Hygiene and Tropical Medicine, Keppel Street, London WC1E

7HT, UK.

<sup>2</sup> Senior Adviser (Health Economics), NICE International, National Institute for Health and Clinical

Excellence, 71 High Holborn, London WC1V 6NE

<sup>3</sup>Lecturer in Health Economics, Faculty of Public Health and Policy, London School of Hygiene and

Tropical Medicine, Keppel Street, London WC1E 7HT, UK.

## Address correspondence to:

s.casson@nhs.net

## Contents

- Word count of abstract, article summary, introduction, methods, results, discussion and references is ~~35993~~17.
- Three tables.
- One figure
- 11 references.



## Funding

This research received no specific grant from any funding agency in the public, commercial or not-for-profit sectors. It was conducted as part of an MSc degree at the LSHTM.

## Declaration of Competing Interests

SC has no relationship with NICE. AM is a current member of one of NICE's Technology Appraisal Committee's and its Technology Appraisals' Decision Support Unit. FR is a member of NICE International, a not-for-profit consultancy service within NICE. FR, SC and AM have no other non-financial interests that may be relevant to the submitted work.

## Ethics Statement

This project did not involve any human subjects or any human data. Therefore ethics approval was not required.

## Contributors

SC collected, processed, and analysed the data and drafted the paper. AM conceived the subject for study, provided expert opinion on methodology / approach, contributed to the statistical analysis and helped write the text. FR contributed to the writing and discussion. AM is the guarantor.

## Acknowledgements

Nina Pinwill, Associate Director at NICE, advised on appraisal processes and the selection of time points suitability for analysis, ~~and~~ NP also provided the missing data described in the text.

## Data sharing

No further data available.

## Abstract

**Objectives:** To assess how long the UK's National Institute for Health and Clinical Excellence's (NICE) Technology Appraisal Programme has taken to produce guidance and to determine independent predictors of time to guidance.

**Design:** Retrospective time to event (survival) analysis.

**Setting:** Technology Appraisal's guidance produced by NICE.

**Datasource:** All appraisals referred to NICE by February 2010 were included, except those referred prior to 2001 and a number ~~of those~~ that were suspended.

**Outcome measure:** Duration from the start of an appraisal (when the scope document was released) until publication of guidance.

**Results:** Single Technology Appraisals (STAs) were published significantly faster than Multiple Technology Appraisals (MTAs) with median durations of 48.0 (interquartile range [IQR]; 44.3 to 75.4) and 74.0 (IQR; 60.9 to 114.0) weeks respectively ( $p < 0.0001$ ). Median time to publication exceeded published process timelines, even after adjusting for appeals. Results from the modelling suggest that STAs published guidance results significantly faster ~~guidance~~ than MTAs after adjusting for other covariates (by 36.2 weeks [95% CI -46.05 to -26.42 weeks]) and that appeals against provisional guidance significantly increased the time to publication (by 42.83 weeks [95% CI 35.50 to 50.17 weeks]). There was no evidence that STAs of cancer-related

1  
2  
3 technologies took longer to complete compared with STAs of other technologies after adjusting  
4  
5 for potentially confounding variables and only weak evidence suggesting that the time to  
6  
7 produce guidance is increasing each year (by 1.40 weeks [95% CI -0.35 to 2.94 weeks]).  
8  
9

10  
11 **Conclusions:** The results from this study suggest that the STA process has resulted in  
12  
13 significantly faster guidance compared with the MTA process irrespective of topic, but that these  
14  
15 gains are lost if appeals are made against provisional guidance. While NICE processes  
16  
17 continue to evolve over time, a trade off might be that decisions take longer but at present there  
18  
19 is no evidence of a significant increase in duration.  
20  
21  
22  
23  
24  
25  
26

## 27 Article summary

### 28 Article focus

- 29 • How long has NICE's Technology Appraisals taken to produce guidance?
- 30 • What features of an appraisal independently predict the time to publication of guidance?

### 31 Key messages

- 32 • The STA process has reduced the time to publication by about 36 weeks irrespective of topic.
- 33 • Appeals against final appraisal determinations have more than doubled the time it takes for STAs  
34 to conclude. No other factors were strongly predictive of the time to guidance.
- 35 • No variables predicting the likelihood of an appeal were identified.

### 36 Strengths and limitations of this study

- 37 • Use of survival time to event analysis is a significant improvement on previous studies addressing  
38 the primary question.
- 39 ~~• Time to guidance is not in itself an indicator of the 'quality' of decision.~~
- 40 • Other factors might also independently predict the time to guidance, such as consideration of  
41 patient access schemes and the number of consultees on each appraisal.

## Introduction

In England and Wales, the primary role of National Institute for Health and Clinical Excellence's (NICE's) Centre for Health Technology Evaluation is to produce guidance on the appropriate use of technologies for the NHS. Prior to 2005 all appraisals were undertaken using its Multiple Technology Appraisal (MTA) process [1]. However, following criticism of the slow production of guidance [2], [3], NICE established the Single Technology Appraisal (STA) process in 2005 with the objective of producing faster guidance closer to the time of product launch [4, 5]. Both processes produce determinations intended to guide decisions on technology adoption. Both respond to the challenge of uncertainty which already exists (but has not previously been addressed) or which has been produced by the arrival of novel technology or new evidence. MTAs and STAs are largely identical in structure (but not scheduling) with the exception of the sub-process which assesses the evidence of effectiveness and cost-effectiveness. The substantive differences therein are firstly the party responsible for the assessment, and secondly the scope of the analysis. In MTA, independent reviewers produce a comparative analysis of technologies for an indication and manufacturers also submit assessments. However in STAs, manufacturers submissions are limited to the consideration of a single technology and the independent review is restricted to a critique of this submission. Precise details of both processes can be found elsewhere [1, 6]. ~~Precise details of both processes can be found elsewhere [1, 6] but the STA\_ is largely similar to the MTA but focuses on a single technology rather than a broader set, as its name implies, and the independent assessment of the evidence is restricted to a critique of the manufacturers submission rather than including a de novo systematic review and economic evaluation; it has been likened to the process used by the Scottish Medicine's Consortium [8].~~ STA adoption has been rapid, increasing from 13% of all technology appraisals in June 2008 to 43.4% by February 2010.

1  
2  
3 STAs and MTAs should in theory take 43 and 60 weeks respectively to conclude in the absence  
4 of an appeal against the provisional guidance (more formally known as a 'final appraisal  
5 determination'). A number of studies have attempted to assess whether the processes have  
6 met these targets and whether the STA process has resulted in faster guidance [7-9]. For  
7 example, Ford et al suggests that the STA has reduced the time to produce guidance, but not  
8 for cancer-related technologies [8]. O'Neill also suggests that the STA has reduced the average  
9 time to guidance, by approximately 1 year [9]. However, both analyses are limited. Firstly, Ford  
10 ~~only~~ considers the time from product launch to guidance, rather than choosing a starting point  
11 on or after the point at which NICE assumes full control, and that is the date on which from the  
12 time NICE is formally requested to appraise a technology by the Department of Health; ~~\_-~~ NICE  
13 has only limited influence on the request date from the Department of Health. ~~'controls' the latter~~  
14 ~~to some extent.~~ Secondly, the studies only include completed appraisals; no adjustments were  
15 made for ongoing, and potentially lengthy, assessments. This means sing that the results could  
16 be biased. ~~Last~~ Thirdly, while Ford and O'Neill attempted to identify independent predictors of  
17 the time to guidance, none assessed these using formal statistical approaches for time to event  
18 data. Finally, -and no attempts were made to formally identify the individual contribution of each  
19 explanatory variable to the total time. The purpose of this study is to address all of these  
20 issues.

## Methods

### Inclusion criteria

All appraisals referred to NICE by Feb 2010 were considered for inclusion. However, MTAs prior to 2001 were excluded as they followed a different process to more recent MTAs. Appraisals were also excluded (19 STAs and 7 MTAs) if they had been suspended or postponed following initial referral from the Department of Health but before NICE issued the final scope document. ~~For example, the Institute was asked to assess the cost effectiveness of 'faller's clinics' for elderly individuals. However, the appraisal was stopped before consultees were asked to submit evidence as the difficulties of defining an intervention became clear.~~

### Key dates, durations and data sources

Data for the analysis was taken from NICE's website. A small amount of missing data (comprised of 21 start dates, 6 suspension dates, 4 appeal announcement dates, and 6 process types i.e. MTA or STA) was provided directly by NICE, on request. The 'core' appraisal time period was bounded as follows. Start dates were calculated for the majority of appraisals using the 'final scope' date, as this was the earliest consistently-recorded time point available throughout the whole dataset. ~~;~~ ~~t~~ This date is also in line with when NICE 'starts the clock'. The ~~S~~scope documents issued include information on the intervention(s) to be evaluated and the relevant comparator programmes. ~~;~~ ~~and~~ The time of scope document release can be viewed as a formal appraisal start date for the purposes of inviting and constructing evidenced based submissions. Where this date was unknown (for 1 STA and 6 MTAs), the start date was inferred using the 'closing date for submissions to appraisal process by consultees'. This time point is scheduled to occur at week 9 in the STA process or week 14 for a MTA. Subtraction of the relevant number of weeks (9 or 14) allowed the start of the core process to be inferred.

## Statistical analysis

The data ~~effectively represent 'to time to an event', meaning it~~ was analysed using time to event (survival) analysis techniques with the 'event' being publication of guidance. Time to publication was initially assessed using Kaplan-Meier (KM) techniques, stratified by the parameter of interest (e.g. STA / MTA process). Statistical significance was estimated using the log-rank test. The end (censor) date was taken to be the date final guidance was published, the date an appraisal was suspended, or 13<sup>th</sup> February 2010 (the end of the data collection period), whichever occurred first. Rather than use Cox proportional hazard models to adjust KM results for multiple independent parameters, parametric techniques were instead used. This was because the latter is able to generate predictions of time to publication of guidance for censored events, and to provide direct estimations of the independent contribution of each predictive variable to the total time to guidance (i.e. the marginal effect). For example, the number of weeks an appeal has added to the length of a MTA or STA can be calculated, all other factors held constant. A number of different parametric survival time to event models were fitted to the data including exponential, Weibull, lognormal, loglogistic, Gompertz and gamma. The model that minimised Akaike's information criterion (AIC) was selected for use. Sensitivity analysis was also used to assess the effect of using alternative parametric model forms. Additionally, logistic regression was used to ~~identify~~ assess whether a number of independent variables predicted the likelihood of an appeal. The proportion of appraisals completing within anticipated process times (43 and 60 weeks for STAs and MTAs) were assessed by assuming a binomial distribution. All analyses were undertaken using STATA v12.

## Choice of independent variables

The choice of appraisal process (STA or MTA) was an obvious parameter for inclusion, since STAs are designed to be shorter than MTAs. Other parameters were identified using existing

1  
2  
3 literature and consideration of the underlying processes. For example, it is logical that an  
4  
5 appeal against provisional guidance could add substantially to the time it takes to publish final  
6  
7 guidance. Other authors have also suggested that cancer appraisals are typically more  
8  
9 complex and 'controversial', given that they tend to be associated with high incremental cost-  
10  
11 effectiveness ratios, meaning they take longer to complete. NICE considers revising published  
12  
13 appraisal guidance every 1-3 years. Given that in theory ~~these such~~ revisions should be adding  
14  
15 to an existing evidence base, it was suspected that the ~~sey~~ might take a shorter time to complete  
16  
17 compared with other appraisals. O'Neill suggested that there was no evidence that appraisals  
18  
19 are generally taking longer to complete, a so called 'time-trend'. However, ~~O'Neill they~~ also  
20  
21 suggests that this conclusion should be revisited ~~[using more formal statistical approaches]~~.  
22  
23  
24  
25  
26

27 For these reasons, the following independent variables were included in the ~~survival~~time to  
28  
29 event analysis and logistic regression analysis: review of existing appraisal (yes / no), drug (yes  
30  
31 / no), cancer-related topic (yes / no), whether an appeal on the final appraisal determination  
32  
33 (yes / no), calendar year of appraisal start (2001 to 2010) and an interaction term between STA  
34  
35 and cancer to test whether there was a difference between cancer-related and remaining STAs.  
36  
37 Other parameters were considered for inclusion, some of which had previously been studied.  
38  
39 ~~These included, such as~~ consideration of patient access schemes, guidance that ultimately  
40  
41 restricted the use of a technology, and the number of groups (consultees) who were formally  
42  
43 engaged with an appraisal. However, ~~such parameter they~~ were ~~ultimately~~ rejected from the  
44  
45 final model because of difficulties in consistently collecting this evidence. For example, a  
46  
47 number of patient access schemes have been submitted to NICE, but only more recently has  
48  
49 this become a formal part of NICE's appraisal processes.  
50  
51  
52  
53  
54

55 The basic tested hypothesis was that none of the independent parameters independently  
56  
57 predicted the time to publication of guidance.  
58  
59  
60



## Results

Data was collected on 196 appraisals, 80 STAs and 116 MTAs, that started between 2001 and 2010 (Table 1). All but one STA appraised the use of drugs, and almost 40% of all appraisals were cancer-related. Approximately half of the STAs had been published (39/80) by the time of analysis, as had 84% (97/116) of the MTAs. Over 20% (45/196) of the appraisals included at least one appeal and 15% (29/196) were reviews of existing guidance.

The estimates of process length for completed STAs (published on time: 9/39 = 23%,  $p=0.001$ ) and MTAs (19/97 = 20%,  $p<0.001$ ) exceeded NICE's timetabled targets of 43 and 60 weeks respectively with corresponding median times of 45.4 (IQR 43.3 to 55.9) and 69.6 weeks (IQR 60.9 to 111.1). The proportion of appraisals from both processes continued to exceed published timelines after removing appraisals containing appeals ( $p<0.01$  in both instances), although the median times were much closer to target levels (STA median 44.8 weeks, IQR 42.3 to 48.0; MTA median 61.6 weeks, IQR 57.7 to 71.1).

Results from the KM analysis showed that production of guidance was significantly faster for STAs than for MTAs; the median time to guidance was 48.0 weeks (interquartile range [IQR] 44.3 to 75.4) and 74.0 weeks (IQR; 60.9 to 114.0) for the STA and MTA processes respectively ( $p\text{-value}<0.0001$ , Figure 1). Further stratified analysis (Table 2) suggested that appeals significantly extended the time to guidance for both MTAs and STAs ( $p<0.001$ ), and that cancer-related STAs were significantly longer compared with non-cancer STAs ( $p=0.02$ ). None of the remaining comparisons were statistically significant.

Results from the multivariate parametric modelling suggested that the loglogistic model was the most appropriate to use. STA and appeals were shown to be associated with faster and slower

1  
2  
3 times to guidance respectively (Table 3). None of the remaining variables were significantly  
4  
5 associated with the time to guidance although there was weak evidence of a yearly increase in  
6  
7 the time it has taken to publish guidance (1.40 weeks [95% CI -0.35 to 2.94 weeks]). Sensitivity  
8  
9 analysis using different distributional forms had negligible effects on the results. None of the  
10  
11 covariates were found to be predictive of the likelihood of an appeal (data not shown).  
12  
13  
14  
15  
16  
17  
18  
19  
20  
21  
22  
23  
24  
25  
26  
27  
28  
29  
30  
31  
32  
33  
34  
35  
36  
37  
38  
39  
40  
41  
42  
43  
44  
45  
46  
47  
48  
49  
50  
51  
52  
53  
54  
55  
56  
57  
58  
59  
60

For peer review only

## Discussion

The results from this analysis show that NICE's STA process produced much faster guidance to the NHS compared with the MTA process, by about 35 weeks. But appeals against provisional guidance, when they occurred, more than offset this gain. The results from the KM analysis suggested that cancer-related STAs were longer than non-cancer STAs. However, the difference was no longer statistically significant when adjustments were made for other variables. The evidence that each year appraisal length is independently increasing is weak at best (increase of 1.40 weeks [95% CI -0.35 to 2.94 weeks]). Variables indicating whether a technology was a drug or a review of existing guidance were not predictive of the time to guidance.

### How does this compare to other studies?

The percentages of MTAs and STAs completing within timetabled targets are consistent with those reported by O'Neill [et al](#) [9]. While the estimates of STA duration were also similar, the time taken to produce MTAs was not; O'Neill [and colleagues](#) stated [a duration of](#) about 100 weeks whereas our unadjusted estimate was nearer to 74 weeks indicating a much smaller difference between the two process [types](#). It is possible that methodological differences could explain these findings. For example, MTAs appraise the use of more than one technology. O'Neill considered each technology within a MTA to represent a discrete decision, thus an appraisal with three recommendations was effectively taken to be equivalent to three appraisals. In this study each appraisal was taken to represent a single event irrespective of the number of recommendations it contained. However, irrespective of the best approach, it should be noted that NICE clearly states published timelines represent a *minimum* amount of time to publication and that the median times were within 2 weeks of target levels when appraisals containing appeals were removed from our analysis.

1  
2  
3 O'Neill [et al](#) [9] reported that STAs were substantially faster than MTAs. [The unadjusted](#)  
4 [analysis of](#) Ford [et al's](#) [8] ~~unadjusted analysis~~ also suggests that STAs have reduced the time  
5 to guidance compared with MTAs, but not for STAs of cancer-related technologies. We agree  
6 with the general finding that the STA has significantly reduced the time to guidance. However,  
7 while our unadjusted KM analysis also suggests STAs of cancer-related technologies were  
8 slower to complete compared with their non-cancer related counterparts, the difference was no  
9 longer significant when adjustments were made for other variables, including appeals.

10  
11 Both O'Neill and Ford include analyses that estimate the time between product launch and  
12 production of ~~NICE~~ guidance [by NICE](#), presumably because a specific objective of the STA  
13 process is to minimise this time period. ~~However, Our~~ analysis ~~only~~ used the point at which  
14 NICE issued its final scope as the appraisal starting point. We elected not to use the time of  
15 product launch [for a number of reasons. as in our opinion](#) ~~Firstly,~~ the date is difficult to measure  
16 accurately and [specifically, as there is no readily available source of indication-specific license](#)  
17 [dates. Secondly, the time from product launch to start of the NICE process is largely outside of](#)  
18 [NICE's control. Thirdly, and perhaps most more](#) importantly, [the duration derived from use of](#)  
19 [the launch date](#) often has little meaning. For example, guidance on the use of vinorelbine for  
20 advanced breast cancer (TA 54) [10] was published in 2002, whereas its marketing  
21 authorisation was issued in 1997, two years before NICE existed.

22  
23 O'Neill et al cautiously stated that there was no evidence that either the STA or MTA have  
24 increased in length over time. We agree with this conclusion.

## 25 **Strengths and limitations**

26  
27 The main strength of this analysis compared with previous studies is that it uses formal  
28 [survival time to event](#) analysis techniques to assess the time to publication of guidance, ~~and in~~

1  
2  
3  
4  
5  
6  
7  
8  
9  
10  
11  
12  
13  
14  
15  
16  
17  
18  
19  
20  
21  
22  
23  
24  
25  
26  
27  
28  
29  
30  
31  
32  
33  
34  
35  
36  
37  
38  
39  
40  
41  
42  
43  
44  
45  
46  
47  
48  
49  
50  
51  
52  
53  
54  
55  
56  
57  
58  
59  
60

doing so, adjustments ~~these estimates are made~~ for potentially confounding variables and ~~generates~~ estimates of the marginal contribution of each variable to the total time are generated. This said, there are a number of limitations. Firstly, the start of each appraisal was taken to be the time at which consultees are formally invited to submit evidence, ~~set as this is point at which appraisals formally start; set~~ as the time at which the final scope document is issued. ~~However, An alternative viewpoint could be that since~~ NICE consults on scope documents, ~~meaning that~~ appraisals in some senses start about 3 months earlier, ~~; although t even though~~ there is no guarantee ~~at during the consultation this time~~ that the appraisal will proceed. While including this extra time would increase the median time to guidance, it is unlikely to alter the predictive value of the explanatory variables. Secondly, no account was taken of interruptions that were outside of NICE's control, such as public holidays or publication embargos during general elections; the latter can be lengthy. Thirdly, MTAs usually result in guidance that relates to the use of more than one technology. In this analysis all appraisals have been treated as equal, in so much that no account has been made of the number of technologies being appraised. However, it is conceivable that one MTA of (say) three technologies could be shorter, in terms of calendar time, than three separate STAs. This could, ~~meaning~~ that comparisons of the two processes should be treated with some caution. Fourthly, there is a potential issue of endogeneity in the statistical analysis since it is possible that appeals are at least partly a result of the other independent variables. While this cannot be completely ruled out, none of the examined variables were independently predictive of an appeal, thus we think this issue is unlikely to be important. Lastly, although it is likely that other variables may be related to the time to guidance, there are often challenges in quantifying them. One such example is the number or mix of consultees, which could reflect the complexity / level of interest in a particular area. We could not find a reliable method of quantifying this potential predictor of time to guidance; patient groups often produce joint submissions, and only the product manufacturer is officially a consultee in a STA, while we have used time to guidance as

1  
2  
3 a single outcome measure, other outcomes, such as 'quality' of the recommendations, are  
4 clearly also important.  
5  
6  
7  
8 It has also been suggested that the scale of the evidence base could act as a predictor of  
9 duration. However, the conceptual nature of any such relationship is not clear. One hypothesis  
10 could be that where there exists only a small number of trials, the time to guidance would be  
11 shorter. However Ford et al [8] suggest an alternative hypothesis. They suggest that a limited  
12 evidence base can produce uncertainties in cost-effectiveness data, causing problems in setting  
13 start/stop prescribing rules. Such a "challenge to the appraisal committee" could result in a  
14 request for further information and consequential delays i.e. increased time to guidance. The  
15 question of whether such an association exists would be best answered using a range of  
16 qualitative and quantitative methods and goes beyond the scope of this study.  
17  
18  
19  
20  
21  
22  
23  
24  
25  
26  
27  
28  
29

## 30 Conclusion and recommendation

31  
32  
33 In summary, the evidence suggests that despite the incorporation of more detailed methods and  
34 processes over the past decade, the time it has taken NICE to produce guidance over the past  
35 decade has not independently increased [11]. The introduction of the STA process has resulted  
36 in the production of significantly faster guidance to the NHS, irrespective of clinical topic.  
37  
38

39  
40  
41 However, appeals when they occur can significantly extend this time. We therefore recommend  
42 that where possible, efforts be made to develop working practices and processes which can  
43 reduce the need for them such appeals.  
44  
45  
46  
47  
48  
49  
50  
51  
52  
53  
54  
55  
56  
57  
58  
59  
60

## References

1. National Institute for Health and Clinical Excellence, *Guide to the multiple technology appraisal process*, 2009.
2. Mayor, S., *NICE to issue faster guidance to the NHS*. *BMJ*, 2005. **331**: p. 1101.
3. Haycox, A., *Does 'NICE blight' exist, and if so, why?* *Pharmacoeconomics*. *Pharmacoeconomics*, 2008. **26**: p. 987-989.
4. NICE, *Guide to the single technology appraisal process*, 2009, National Institute for Health and Clinical Excellence,.
5. Wailoo, A. and C. Pickstone, *A Review Of The Nice Single Technology Appraisal Process*, 2008, School of Health and Related Research, University of Sheffield (Decision Support Unit),.
6. National Institute for Health and Clinical Excellence, *Guide to the single technology appraisal process*, 2009.
7. Barham, L., *Single Technology Appraisals by NICE -- are they delivering faster guidance to the NHS?* *Pharmacoeconomics*, 2008. **26**: p. 1037-43.
8. Ford, J.A., et al., *NICE guidance: a comparative study of the introduction of the single technology appraisal process and comparison with guidance from Scottish Medicines Consortium*. *BMJ Open*, 2012. **2**(1).
9. O'Neill, P., N. Devlin, and Puig-Peró, *Time trends in NICE HTA decisions*, in *Consulting report 2012*, Office of Health Economics: London.
10. National Institute for Health and Clinical Excellence. *Guidance on the use of vinorelbine for the treatment of advanced breast cancer*. Technology Appraisal Guidance 2002 01/01/2012]; Available from: <http://guidance.nice.org.uk/TA54>.
11. Mechanic, D., *Dilemmas in rationing health care services: the case for implicit rationing*. *BMJ*, 1995. **310**(6995): p. 1655-1659.

## Tables

Table 1: Appraisals included in the analysis (n=196)

| Variable                     | STA | MTA |
|------------------------------|-----|-----|
| n                            | 80  | 116 |
| Guidance published*          | 39  | 97  |
| Appraisal suspended*         | 8   | 14  |
| Appraisal of a drug or drugs | 79  | 73  |
| Appraisal cancer-related     | 47  | 29  |
| At least one appeal**        | 9   | 36  |
| Review                       | 3   | 26  |

\*at the time the analysis was undertaken

\*\*appeals are made by consultees (often the producer of the technology) against final appraisal determinations, that is, NICE's provisional guidance. See XX for further details.



Table 2. Results of Kaplan Meier analysis (weeks), log-rank tests of equality of survivor functions

| Strata            | MTA n=116 |                       |         | STA n=80 |                      |         |
|-------------------|-----------|-----------------------|---------|----------|----------------------|---------|
|                   | N         | Median (IQR)          | p-value | N        | Median (IQR)         | p-value |
| <b>Cancer</b>     | 23        | 66.5 (60.6 to 111.1)  |         | 18       | 57.0 (42.3 to 87.9)  |         |
| <b>No Cancer</b>  | 74        | 74.0 (61.4 to 116.1)  | 0.43    | 21       | 45.4 (44.7 to 55.7)  | 0.02    |
| <b>Review</b>     | 17        | 68.4 (61.4 to 111.1)  |         | 1        | 44.1 (N/A)           |         |
| <b>Non review</b> | 80        | 74.0 (60.9 to 116.4)  | 0.65    | 38       | 51.0 (44.7 to 75.4)  | 0.18    |
| <b>Drug</b>       | 59        | 77.6 (62.4 to 116.3)  |         | 39       | 48.0 (44.3 to 75.4)  |         |
| <b>Non drug</b>   | 38        | 66.6 (57.7 to 91.8)   | 0.11    | 0        | N/A                  | -       |
| <b>Appeal*</b>    | 35        | 116.1 (91.9 to 136.9) |         | 7        | 76.7 (65.0 to 105.3) |         |
| <b>No appeal</b>  | 62        | 61.6 (57.7 to 71.1)   | <0.001  | 32       | 44.9 (42.3 to 48.0)  | <0.001  |

\*Indicates at least one appeal; IQR, interquartile range; N indicates observed events; N/A, not applicable

Table 3: Results from the loglogistic modelling

| Variable               | Coefficient | 95% CI         | p-value | Marginal effect<br>(weeks) <sup>†</sup> | 95% CI           |
|------------------------|-------------|----------------|---------|-----------------------------------------|------------------|
| <b>STA*</b>            | -0.49       | -0.62 to -0.36 | <0.001  | -36.2                                   | -46.05 to -26.42 |
| <b>Cancer*</b>         | -0.03       | -0.002 to 0.04 | 0.60    | -2.06                                   | -9.80 to 5.70    |
| <b>STA x cancer</b>    | 0.13        | -0.05 to 0.30  | 0.15    | 9.23                                    | -3.36 to 21.81   |
| <b>Drug*</b>           | 0.08        | -0.01 to 0.20  | 0.08    | 6.10                                    | -0.75 to 12.87   |
| <b>Review*</b>         | -0.04       | -0.12 to 0.07  | 0.43    | -3.26                                   | -11.39 to 4.87   |
| <b>Ever an appeal*</b> | 0.60        | 0.50 to 0.67   | <0.001  | 42.83                                   | 35.50 to 50.17   |
| <b>Year started**</b>  | 0.02        | -0.002 to 0.04 | 0.073   | 1.40                                    | -0.35 to 2.94    |
| <b>Ln_gamma</b>        | -2.06       | -2.20 to -1.91 | <0.001  | -                                       | -                |

Log likelihood = 2.23; constant = 4.04; \*yes = 1, no =0; \*\*where values range between (200)1 and (20)10;

<sup>†</sup>indicates the independent contribution to the median to time to publication;  $\beta$  values less than 0 indicate variables are associated with a shorter time to guidance; CI – confidence interval

## Figures

Figure 1. Kaplan-Meier survival-time to event estimate of time to publication of guidance

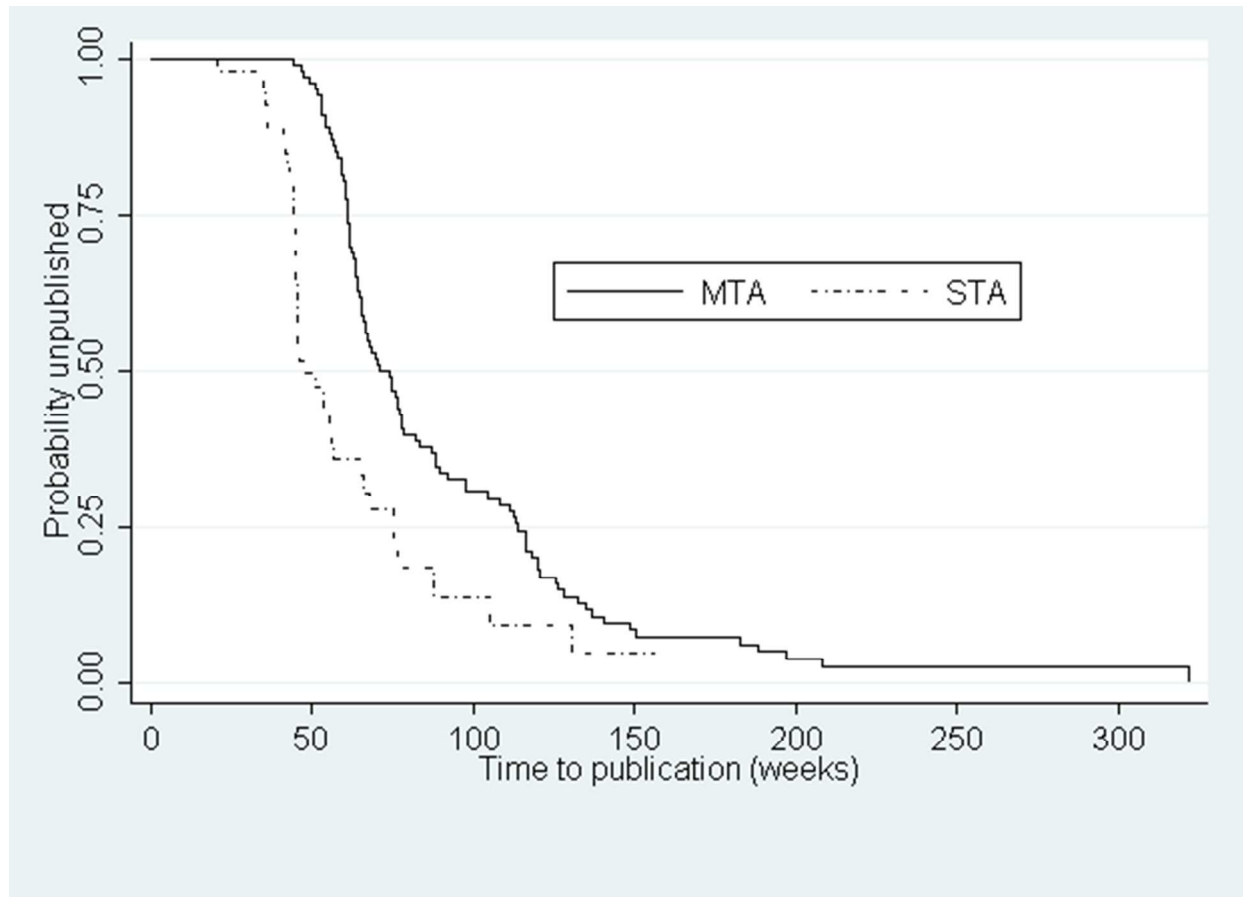

1  
2  
3  
4  
5  
6  
7  
8  
9  
10  
11  
12  
13  
14  
15  
16  
17  
18  
19  
20  
21  
22  
23  
24  
25  
26  
27  
28  
29  
30  
31  
32  
33  
34  
35  
36  
37  
38  
39  
40  
41  
42  
43  
44  
45  
46  
47  
48  
49  
50  
51  
52  
53  
54  
55  
56  
57  
58  
59  
60



Figure 1. Kaplan-Meier survival estimate of time to publication of guidance.  
217x158mm (300 x 300 DPI)

view only

## How long has NICE taken to produce Technology Appraisal guidance? A retrospective study to estimate predictors of time to guidance

Steven G Casson MA(Cantab) MB BChir MSc MFPH<sup>1</sup>, Francis Ruiz BSc MSc<sup>2</sup>, Alec Miners BA MSc PhD<sup>3</sup>,

<sup>1</sup> SpR in Public Health, London School of Hygiene and Tropical Medicine, Keppel Street, London WC1E 7HT, UK.

<sup>2</sup> Senior Adviser (Health Economics), NICE International, National Institute for Health and Clinical Excellence, 71 High Holborn, London WC1V 6NE

<sup>3</sup> Lecturer in Health Economics, Faculty of Public Health and Policy, London School of Hygiene and Tropical Medicine, Keppel Street, London WC1E 7HT, UK.

### Address correspondence to:

s.casson@nhs.net

### Contents

- Word count of abstract, article summary, introduction, methods, results, discussion and references is 3599.
- Three tables.
- One figure
- 11 references.

### Funding

This research received no specific grant from any funding agency in the public, commercial or not-for-profit sectors. It was conducted as part of an MSc degree at the LSHTM.

### Declaration of Competing Interests

SC has no relationship with NICE. AM is a current member of one of NICE's Technology Appraisal Committee's and its Technology Appraisals' Decision Support Unit. FR is a member of NICE International, a not-for-profit consultancy service within NICE. FR, SC and AM have no other non-financial interests that may be relevant to the submitted work.

### Ethics Statement

This project did not involve any human subjects or any human data. Therefore ethics approval was not required.

### Contributors

SC collected, processed, and analysed the data and drafted the paper. AM conceived the subject for study, provided expert opinion on methodology / approach, contributed to the statistical analysis and helped write the text. FR contributed to the writing and discussion. AM is the guarantor.

### Acknowledgements

Nina Pinwill, Associate Director at NICE, advised on appraisal processes and the selection of time points suitable for analysis. NP also provided the missing data described in the text.

### Data sharing

No further data available.

## Abstract

**Objectives:** To assess how long the UK's National Institute for Health and Clinical Excellence's (NICE) Technology Appraisal Programme has taken to produce guidance and to determine independent predictors of time to guidance.

**Design:** Retrospective time to event (survival) analysis.

**Setting:** Technology Appraisal guidance produced by NICE.

**Datasource:** All appraisals referred to NICE by February 2010 were included, except those referred prior to 2001 and a number that were suspended.

**Outcome measure:** Duration from the start of an appraisal (when the scope document was released) until publication of guidance.

**Results:** Single Technology Appraisals (STAs) were published significantly faster than Multiple Technology Appraisals (MTAs) with median durations of 48.0 (interquartile range [IQR]; 44.3 to 75.4) and 74.0 (IQR; 60.9 to 114.0) weeks respectively ( $p < 0.0001$ ). Median time to publication exceeded published process timelines, even after adjusting for appeals. Results from the modelling suggest that STAs published guidance significantly faster than MTAs after adjusting for other covariates (by 36.2 weeks [95% CI -46.05 to -26.42 weeks]) and that appeals against provisional guidance significantly increased the time to publication (by 42.83 weeks [95% CI 35.50 to 50.17 weeks]). There was no evidence that STAs of cancer-related technologies took

1  
2  
3 longer to complete compared with STAs of other technologies after adjusting for potentially  
4  
5 confounding variables and only weak evidence suggesting that the time to produce guidance is  
6  
7 increasing each year (by 1.40 weeks [95% CI -0.35 to 2.94 weeks]).  
8  
9

10  
11 **Conclusions:** The results from this study suggest that the STA process has resulted in  
12  
13 significantly faster guidance compared with the MTA process irrespective of topic, but that these  
14  
15 gains are lost if appeals are made against provisional guidance. While NICE processes  
16  
17 continue to evolve over time, a trade off might be that decisions take longer but at present there  
18  
19 is no evidence of a significant increase in duration.  
20  
21  
22  
23  
24  
25  
26

## 27 Article summary

### 28 Article focus

- 29 • How long has NICE's Technology Appraisals taken to produce guidance?
- 30 • What features of an appraisal independently predict the time to publication of guidance?

### 31 Key messages

- 32 • The STA process has reduced the time to publication by about 36 weeks irrespective of topic.
- 33 • Appeals against final appraisal determinations have more than doubled the time it takes for STAs  
34 to conclude. No other factors were strongly predictive of the time to guidance.
- 35 • No variables predicting the likelihood of an appeal were identified.

### 36 Strengths and limitations of this study

- 37 • Use of time to event analysis is a significant improvement on previous studies addressing the  
38 primary question.
- 39 • Other factors might also independently predict the time to guidance, such as consideration of  
40 patient access schemes and the number of consultees on each appraisal.  
41  
42  
43  
44  
45



## Introduction

In England and Wales, the primary role of National Institute for Health and Clinical Excellence's (NICE's) Centre for Health Technology Evaluation is to produce guidance on the appropriate use of technologies for the NHS. Prior to 2005 all appraisals were undertaken using its Multiple Technology Appraisal (MTA) process [1]. However, following criticism of the slow production of guidance [2], [3], NICE established the Single Technology Appraisal (STA) process in 2005 with the objective of producing faster guidance closer to the time of product launch [4, 5]. Both processes produce determinations intended to guide decisions on technology adoption. Both respond to the challenge of uncertainty which already exists (but has not previously been addressed) or which has been produced by the arrival of novel technology or new evidence. MTAs and STAs are largely identical in structure (but not scheduling) with the exception of the sub-process which assesses the evidence of effectiveness and cost-effectiveness. The substantive differences therein are firstly the party responsible for the assessment, and secondly the scope of the analysis. In MTA, independent reviewers produce a comparative analysis of technologies for an indication and manufacturers also submit assessments. However in STAs, manufacturers submissions are limited to the consideration of a single technology and the independent review is restricted to a critique of this submission. Precise details of both processes can be found elsewhere [1, 6]. ; STA adoption has been rapid, increasing from 13% of all technology appraisals in June 2008 to 43.4% by February 2010. STAs and MTAs should in theory take 43 and 60 weeks respectively to conclude in the absence of an appeal against the provisional guidance (more formally known as a 'final appraisal determination'). A number of studies have attempted to assess whether the processes have met these targets and whether the STA process has resulted in faster guidance [7-9]. For example, Ford et al suggests that the STA has reduced the time to produce guidance, but not for cancer-related technologies [8]. O'Neill also suggests that the STA has reduced the average

1  
2  
3 time to guidance, by approximately 1 year [9]. However, both analyses are limited. Firstly, Ford  
4  
5 considers the time from product launch to guidance, rather than choosing a starting point on or  
6  
7 after the point at which NICE assumes full control, and that is the date on which NICE is  
8  
9 formally requested to appraise a technology by the Department of Health. NICE has only  
10  
11 limited influence on the request date from the Department of Health.. Secondly, the studies only  
12  
13 include completed appraisals; no adjustments were made for ongoing, and potentially lengthy,  
14  
15 assessments. This means that the results could be biased. Thirdly, while Ford and O'Neill  
16  
17 attempted to identify independent predictors of the time to guidance, none assessed these using  
18  
19 formal statistical approaches for time to event data. Finally, no attempts were made to formally  
20  
21 identify the individual contribution of each explanatory variable to the total time. The purpose of  
22  
23 this study is to address all of these issues.  
24  
25  
26  
27  
28  
29  
30  
31  
32  
33  
34  
35  
36  
37  
38  
39  
40  
41  
42  
43  
44  
45  
46  
47  
48  
49  
50  
51  
52  
53  
54  
55  
56  
57  
58  
59  
60

## Methods

### Inclusion criteria

All appraisals referred to NICE by Feb 2010 were considered for inclusion. However, MTAs prior to 2001 were excluded as they followed a different process to more recent MTAs. Appraisals were also excluded (19 STAs and 7 MTAs) if they had been suspended or postponed following initial referral from the Department of Health but before NICE issued the final scope document.

### Key dates, durations and data sources

Data for the analysis was taken from NICE's website. A small amount of missing data (comprised of 21 start dates, 6 suspension dates, 4 appeal announcement dates, and 6 process types i.e. MTA or STA) was provided directly by NICE, on request. The 'core' appraisal time period was bounded as follows. Start dates were calculated for the majority of appraisals using the '*final scope*' date, as this was the earliest consistently-recorded time point available throughout the whole dataset. This date is also in line with when NICE 'starts the clock'. The scope documents issued include information on the intervention(s) to be evaluated and the relevant comparator programmes. The time of scope document release can be viewed as a formal appraisal start date for the purposes of inviting and constructing evidenced based submissions. Where this date was unknown (for 1 STA and 6 MTAs), the start date was inferred using the '*closing date for submissions to appraisal process by consultees*'. This time point is scheduled to occur at week 9 in the STA process or week 14 for a MTA. Subtraction of the relevant number of weeks (9 or 14) allowed the start of the core process to be inferred.

### Statistical analysis

The data was analysed using time to event (survival) analysis techniques with the 'event' being publication of guidance. Time to publication was initially assessed using Kaplan-Meier (KM) techniques, stratified by the parameter of interest (e.g. STA / MTA process). Statistical significance was estimated using the log-rank test. The end (censor) date was taken to be the date final guidance was published, the date an appraisal was suspended, or 13<sup>th</sup> February 2010 (the end of the data collection period), whichever occurred first. Rather than use Cox proportional hazard models to adjust KM results for multiple independent parameters, parametric techniques were instead used. This was because the latter is able to generate predictions of time to publication of guidance for censored events, and to provide direct estimations of the independent contribution of each predictive variable to the total time to guidance (i.e. the marginal effect). For example, the number of weeks an appeal has added to the length of a MTA or STA can be calculated, all other factors held constant. A number of different parametric time to event models were fitted to the data including exponential, Weibull, lognormal, loglogistic, Gompertz and gamma. The model that minimised Akaike's information criterion (AIC) was selected for use. Sensitivity analysis was also used to assess the effect of using alternative parametric model forms. Additionally, logistic regression was used to assess whether a number of independent variables predicted the likelihood of an appeal. The proportion of appraisals completing within anticipated process times (43 and 60 weeks for STAs and MTAs) were assessed by assuming a binomial distribution. All analyses were undertaken using STATA v12.

### Choice of independent variables

The choice of appraisal process (STA or MTA) was an obvious parameter for inclusion, since STAs are designed to be shorter than MTAs. Other parameters were identified using existing

1  
2  
3 literature and consideration of the underlying processes. For example, it is logical that an  
4 appeal against provisional guidance could add substantially to the time it takes to publish final  
5 guidance. Other authors have also suggested that cancer appraisals are typically more  
6 complex and 'controversial', given that they tend to be associated with high incremental cost-  
7 effectiveness ratios, meaning they take longer to complete. NICE considers revising published  
8 appraisal guidance every 1-3 years. Given that in theory such revisions should be adding to an  
9 existing evidence base, it was suspected that these might take a shorter time to complete  
10 compared with other appraisals. O'Neill suggested that there was no evidence that appraisals  
11 are generally taking longer to complete, a so called 'time-trend'. However, O'Neill also suggests  
12 that this conclusion should be revisited using more formal statistical approaches.  
13  
14  
15  
16  
17  
18  
19  
20  
21  
22  
23  
24  
25  
26

27 For these reasons, the following independent variables were included in the time to event  
28 analysis and logistic regression analysis: review of existing appraisal (yes / no), drug (yes / no),  
29 cancer-related topic (yes / no), whether an appeal on the final appraisal determination (yes /  
30 no), calendar year of appraisal start (2001 to 2010) and an interaction term between STA and  
31 cancer to test whether there was a difference between cancer-related and remaining STAs.  
32 Other parameters were considered for inclusion, some of which had previously been studied.  
33 These included consideration of patient access schemes, guidance that ultimately restricted the  
34 use of a technology, and the number of groups (consultees) who were formally engaged with an  
35 appraisal. However, such parameters were rejected from the final model because of difficulties  
36 in consistently collecting this evidence. For example, a number of patient access schemes have  
37 been submitted to NICE, but only more recently has this become a formal part of NICE's  
38 appraisal processes.  
39  
40  
41  
42  
43  
44  
45  
46  
47  
48  
49  
50  
51  
52

53 The basic tested hypothesis was that none of the independent parameters independently  
54 predicted the time to publication of guidance.  
55  
56  
57  
58  
59  
60

## Results

Data was collected on 196 appraisals, 80 STAs and 116 MTAs, that started between 2001 and 2010 (Table 1). All but one STA appraised the use of drugs, and almost 40% of all appraisals were cancer-related. Approximately half of the STAs had been published (39/80) by the time of analysis, as had 84% (97/116) of the MTAs. Over 20% (45/196) of the appraisals included at least one appeal and 15% (29/196) were reviews of existing guidance.

The estimates of process length for completed STAs (published on time: 9/39 = 23%,  $p=0.001$ ) and MTAs (19/97 = 20%,  $p<0.001$ ) exceeded NICE's timetabled targets of 43 and 60 weeks respectively with corresponding median times of 45.4 (IQR 43.3 to 55.9) and 69.6 weeks (IQR 60.9 to 111.1). The proportion of appraisals from both processes continued to exceed published timelines after removing appraisals containing appeals ( $p<0.01$  in both instances), although the median times were much closer to target levels (STA median 44.8 weeks, IQR 42.3 to 48.0; MTA median 61.6 weeks, IQR 57.7 to 71.1).

Results from the KM analysis showed that production of guidance was significantly faster for STAs than for MTAs; the median time to guidance was 48.0 weeks (interquartile range [IQR] 44.3 to 75.4) and 74.0 weeks (IQR; 60.9 to 114.0) for the STA and MTA processes respectively ( $p\text{-value}<0.0001$ , Figure 1). Further stratified analysis (Table 2) suggested that appeals significantly extended the time to guidance for both MTAs and STAs ( $p<0.001$ ), and that cancer-related STAs were significantly longer compared with non-cancer STAs ( $p=0.02$ ). None of the remaining comparisons were statistically significant.

Results from the multivariate parametric modelling suggested that the loglogistic model was the most appropriate to use. STA and appeals were shown to be associated with faster and slower

1  
2  
3 times to guidance respectively (Table 3). None of the remaining variables were significantly  
4  
5 associated with the time to guidance although there was weak evidence of a yearly increase in  
6  
7 the time it has taken to publish guidance (1.40 weeks [95% CI -0.35 to 2.94 weeks]). Sensitivity  
8  
9 analysis using different distributional forms had negligible effects on the results. None of the  
10  
11 covariates were found to be predictive of the likelihood of an appeal (data not shown).  
12  
13  
14  
15  
16  
17  
18  
19  
20  
21  
22  
23  
24  
25  
26  
27  
28  
29  
30  
31  
32  
33  
34  
35  
36  
37  
38  
39  
40  
41  
42  
43  
44  
45  
46  
47  
48  
49  
50  
51  
52  
53  
54  
55  
56  
57  
58  
59  
60

For peer review only

## Discussion

The results from this analysis show that NICE's STA process produced much faster guidance to the NHS compared with the MTA process, by about 35 weeks. But appeals against provisional guidance, when they occurred, more than offset this gain. The results from the KM analysis suggested that cancer-related STAs were longer than non-cancer STAs. However, the difference was no longer statistically significant when adjustments were made for other variables. The evidence that each year appraisal length is independently increasing is weak at best (increase of 1.40 weeks [95% CI -0.35 to 2.94 weeks]). Variables indicating whether a technology was a drug or a review of existing guidance were not predictive of the time to guidance.

### How does this compare to other studies?

The percentages of MTAs and STAs completing within timetabled targets are consistent with those reported by O'Neill et al [9]. While the estimates of STA duration were also similar, the time taken to produce MTAs was not; O'Neill and colleagues stated a duration of about 100 weeks whereas our unadjusted estimate was nearer to 74 weeks indicating a much smaller difference between the two process types. It is possible that methodological differences could explain these findings. For example, MTAs appraise the use of more than one technology. O'Neill considered each technology within a MTA to represent a discrete decision, thus an appraisal with three recommendations was effectively taken to be equivalent to three appraisals. In this study each appraisal was taken to represent a single event irrespective of the number of recommendations it contained. However, irrespective of the best approach, it should be noted that NICE clearly states published timelines represent a *minimum* amount of time to publication and that the median times were within 2 weeks of target levels when appraisals containing appeals were removed from our analysis.



1  
2  
3 O'Neill et al [9] reported that STAs were substantially faster than MTAs. The unadjusted  
4  
5 analysis of Ford et al [8] also suggests that STAs have reduced the time to guidance compared  
6  
7 with MTAs, but not for STAs of cancer-related technologies. We agree with the general finding  
8  
9 that the STA has significantly reduced the time to guidance. However, while our unadjusted KM  
10  
11 analysis also suggests STAs of cancer-related technologies were slower to complete compared  
12  
13 with their non-cancer related counterparts, the difference was no longer significant when  
14  
15 adjustments were made for other variables, including appeals.  
16  
17  
18  
19

20  
21 Both O'Neill and Ford include analyses that estimate the time between product launch and  
22  
23 production of guidance by NICE, presumably because a specific objective of the STA process is  
24  
25 to minimise this time period. However, our analysis used the point at which NICE issued its final  
26  
27 scope as the appraisal starting point. We elected not to use the time of product launch for a  
28  
29 number of reasons. Firstly, the date is difficult to measure accurately and specifically, as there  
30  
31 is no readily available source of indication-specific license dates. Secondly, the time from  
32  
33 product launch to start of the NICE process is largely outside of NICE's control. Thirdly, and  
34  
35 perhaps most importantly, the duration derived from use of the launch date often has little  
36  
37 meaning. For example, guidance on the use of vinorelbine for advanced breast cancer (TA 54)  
38  
39 [10] was published in 2002, whereas its marketing authorisation was issued in 1997, two years  
40  
41 before NICE existed.  
42  
43  
44  
45

46  
47 O'Neill et al cautiously stated that there was no evidence that either the STA or MTA have  
48  
49 increased in length over time. We agree with this conclusion.  
50

## 51 **Strengths and limitations**

52  
53  
54 The main strength of this analysis compared with previous studies is that it uses formal time to  
55  
56 event analysis techniques to assess the time to publication of guidance. In doing so,  
57  
58  
59  
60

1  
2  
3 adjustments are made for potentially confounding variables and estimates of the marginal  
4 contribution of each variable to the total time are generated. This said, there are a number of  
5 limitations. Firstly, the start of each appraisal was taken to be the time at which consultees are  
6 formally invited to submit evidence, set as the time at which the final scope document is issued.  
7 An alternative viewpoint could be that since NICE consults on scope documents, appraisals in  
8 some senses start about 3 months earlier, t even though there is no guarantee during the  
9 consultation that the appraisal will proceed. While including this extra time would increase the  
10 median time to guidance, it is unlikely to alter the predictive value of the explanatory variables.  
11 Secondly, no account was taken of interruptions that were outside of NICE's control, such as  
12 public holidays or publication embargos during general elections; the latter can be lengthy.  
13 Thirdly, MTAs usually result in guidance that relates to the use of more than one technology. In  
14 this analysis all appraisals have been treated as equal, in so much that no account has been  
15 made of the number of technologies being appraised. However, it is conceivable that one MTA  
16 of (say) three technologies could be shorter, in terms of calendar time, than three separate  
17 STAs. This could mean that comparisons of the two processes should be treated with some  
18 caution. Fourthly, there is a potential issue of endogeneity in the statistical analysis since it is  
19 possible that appeals are at least partly a result of the other independent variables. While this  
20 cannot be completely ruled out, none of the examined variables were independently predictive  
21 of an appeal, thus we think this issue is unlikely to be important. Lastly, although it is likely that  
22 other variables may be related to the time to guidance, there are often challenges in quantifying  
23 them. One such example is the number or mix of consultees, which could reflect the complexity  
24 / level of interest in a particular area. We could not find a reliable method of quantifying this  
25 potential predictor of time to guidance; patient groups often produce joint submissions, and only  
26 the product manufacturer is officially a consultee in a STA.  
27 It has also been suggested that the scale of the evidence base could act as a predictor of  
28 duration. However, the conceptual nature of any such relationship is not clear. One hypothesis  
29  
30  
31  
32  
33  
34  
35  
36  
37  
38  
39  
40  
41  
42  
43  
44  
45  
46  
47  
48  
49  
50  
51  
52  
53  
54  
55  
56  
57  
58  
59  
60

1  
2  
3 could be that where there exists only a small number of trials, the time to guidance would be  
4  
5 shorter. However Ford et al [8] suggest an alternative hypothesis. They suggest that a limited  
6  
7 evidence base can produce uncertainties in cost-effectiveness data, causing problems in setting  
8  
9 start/stop prescribing rules. Such a “challenge to the appraisal committee” could result in a  
10  
11 request for further information and consequential delays i.e. increased time to guidance. The  
12  
13 question of whether such an association exists would be best answered using a range of  
14  
15 qualitative and quantitative methods and goes beyond the scope of this study.  
16  
17  
18  
19  
20

## 21 **Conclusion and recommendation**

22  
23  
24 In summary, the evidence suggests that despite the incorporation of more detailed methods and  
25  
26 processes over the past decade, the time it has taken NICE to produce guidance over the past  
27  
28 decade has not independently increased. The introduction of the STA process has resulted in  
29  
30 the production of significantly faster guidance to the NHS, irrespective of clinical topic.  
31  
32 However, appeals when they occur can significantly extend this time. We therefore recommend  
33  
34 that where possible, efforts be made to develop working practices and processes which can  
35  
36 reduce the need for such appeals.  
37  
38  
39  
40  
41  
42  
43  
44  
45  
46  
47  
48  
49  
50  
51  
52  
53  
54  
55  
56  
57  
58  
59  
60

## References

1. National Institute for Health and Clinical Excellence, *Guide to the multiple technology appraisal process*, 2009.
2. Mayor, S., *NICE to issue faster guidance to the NHS*. *BMJ*, 2005. **331**: p. 1101.
3. Haycox, A., *Does 'NICE blight' exist, and if so, why?* *Pharmacoeconomics*. *Pharmacoeconomics*, 2008. **26**: p. 987-989.
4. NICE, *Guide to the single technology appraisal process*, 2009, National Institute for Health and Clinical Excellence,.
5. Wailoo, A. and C. Pickstone, *A Review Of The Nice Single Technology Appraisal Process*, 2008, School of Health and Related Research, University of Sheffield (Decision Support Unit),.
6. National Institute for Health and Clinical Excellence, *Guide to the single technology appraisal process*, 2009.
7. Barham, L., *Single Technology Appraisals by NICE -- are they delivering faster guidance to the NHS?* *Pharmacoeconomics*, 2008. **26**: p. 1037-43.
8. Ford, J.A., et al., *NICE guidance: a comparative study of the introduction of the single technology appraisal process and comparison with guidance from Scottish Medicines Consortium*. *BMJ Open*, 2012. **2**(1).
9. O'Neill, P., N. Devlin, and Puig-Peró, *Time trends in NICE HTA decisions*, in *Consulting report 2012*, Office of Health Economics: London.
10. National Institute for Health and Clinical Excellence. *Guidance on the use of vinorelbine for the treatment of advanced breast cancer*. Technology Appraisal Guidance 2002\_01/01/2012]; Available from: <http://guidance.nice.org.uk/TA54>.

## Tables

Table 1: Appraisals included in the analysis (n=196)

| Variable                     | STA | MTA |
|------------------------------|-----|-----|
| n                            | 80  | 116 |
| Guidance published*          | 39  | 97  |
| Appraisal suspended*         | 8   | 14  |
| Appraisal of a drug or drugs | 79  | 73  |
| Appraisal cancer-related     | 47  | 29  |
| At least one appeal**        | 9   | 36  |
| Review                       | 3   | 26  |

\*at the time the analysis was undertaken

\*\*appeals are made by consultees (often the producer of the technology) against final appraisal determinations, that is, NICE's provisional guidance. See XX for further details.

Table 2. Results of Kaplan Meier analysis (weeks), log-rank tests of equality of survivor functions

| Strata            | MTA n=116 |                       |         | STA n=80 |                      |         |
|-------------------|-----------|-----------------------|---------|----------|----------------------|---------|
|                   | N         | Median (IQR)          | p-value | N        | Median (IQR)         | p-value |
| <b>Cancer</b>     | 23        | 66.5 (60.6 to 111.1)  |         | 18       | 57.0 (42.3 to 87.9)  |         |
| <b>No Cancer</b>  | 74        | 74.0 (61.4 to 116.1)  | 0.43    | 21       | 45.4 (44.7 to 55.7)  | 0.02    |
| <b>Review</b>     | 17        | 68.4 (61.4 to 111.1)  |         | 1        | 44.1 (N/A)           |         |
| <b>Non review</b> | 80        | 74.0 (60.9 to 116.4)  | 0.65    | 38       | 51.0 (44.7 to 75.4)  | 0.18    |
| <b>Drug</b>       | 59        | 77.6 (62.4 to 116.3)  |         | 39       | 48.0 (44.3 to 75.4)  |         |
| <b>Non drug</b>   | 38        | 66.6 (57.7 to 91.8)   | 0.11    | 0        | N/A                  | -       |
| <b>Appeal*</b>    | 35        | 116.1 (91.9 to 136.9) |         | 7        | 76.7 (65.0 to 105.3) |         |
| <b>No appeal</b>  | 62        | 61.6 (57.7 to 71.1)   | <0.001  | 32       | 44.9 (42.3 to 48.0)  | <0.001  |

\*Indicates at least one appeal; IQR, interquartile range; N indicates observed events; N/A, not applicable

Table 3: Results from the loglogistic modelling

| Variable               | Coefficient | 95% CI         | p-value | Marginal effect<br>(weeks) <sup>†</sup> | 95% CI           |
|------------------------|-------------|----------------|---------|-----------------------------------------|------------------|
| <b>STA*</b>            | -0.49       | -0.62 to -0.36 | <0.001  | -36.2                                   | -46.05 to -26.42 |
| <b>Cancer*</b>         | -0.03       | -0.002 to 0.04 | 0.60    | -2.06                                   | -9.80 to 5.70    |
| <b>STA x cancer</b>    | 0.13        | -0.05 to 0.30  | 0.15    | 9.23                                    | -3.36 to 21.81   |
| <b>Drug*</b>           | 0.08        | -0.01 to 0.20  | 0.08    | 6.10                                    | -0.75 to 12.87   |
| <b>Review*</b>         | -0.04       | -0.12 to 0.07  | 0.43    | -3.26                                   | -11.39 to 4.87   |
| <b>Ever an appeal*</b> | 0.60        | 0.50 to 0.67   | <0.001  | 42.83                                   | 35.50 to 50.17   |
| <b>Year started**</b>  | 0.02        | -0.002 to 0.04 | 0.073   | 1.40                                    | -0.35 to 2.94    |
| <b>Ln_gamma</b>        | -2.06       | -2.20 to -1.91 | <0.001  | -                                       | -                |

Log likelihood = 2.23; constant = 4.04; \*yes = 1, no =0; \*\*where values range between (20)1 and (20)10;

<sup>†</sup>indicates the independent contribution to the median to time to publication;  $\beta$  values less than 0 indicate variables are associated with a shorter time to guidance; CI – confidence interval

Figures

Figure 1. Kaplan-Meier time to event estimate of time to publication of guidance

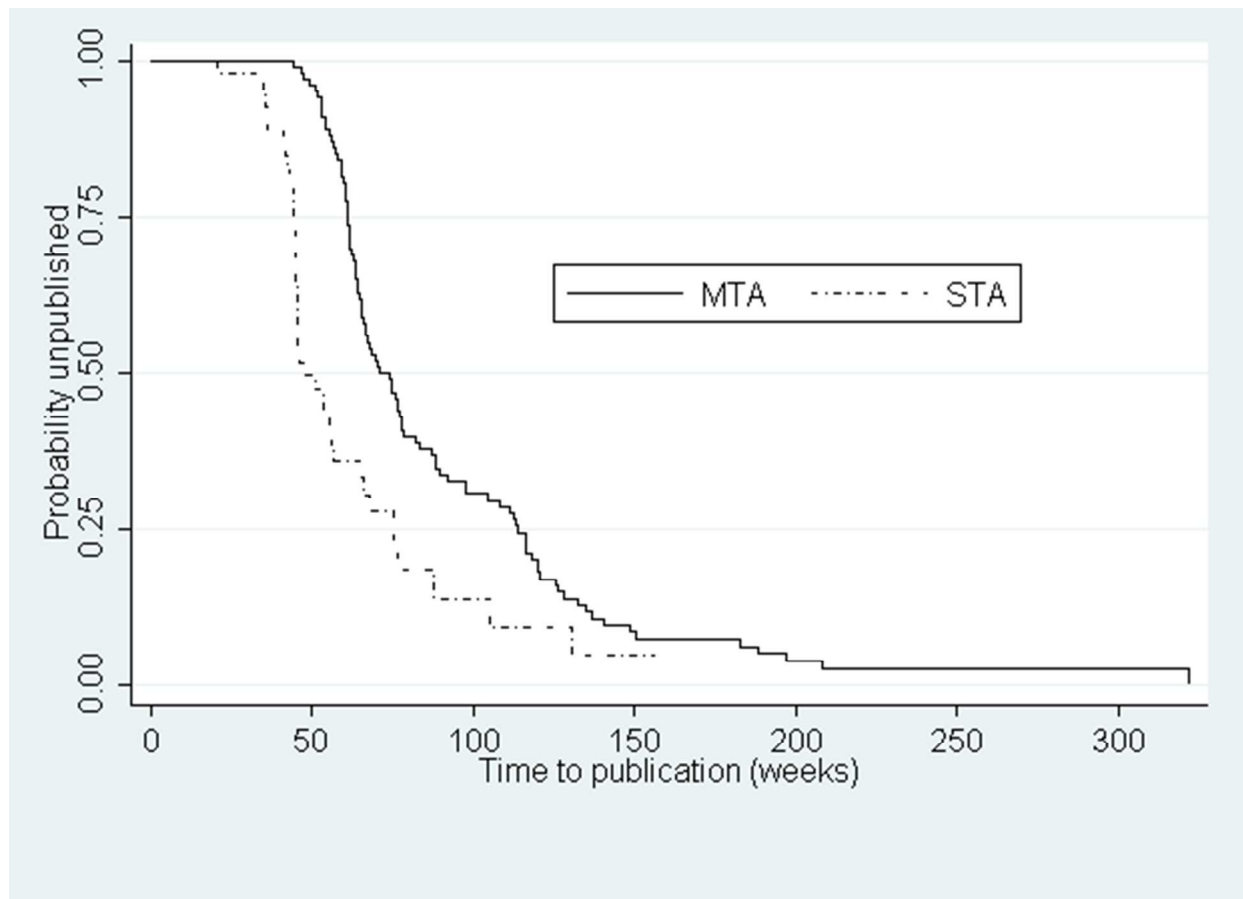





**How long has NICE taken to produce Technology Appraisal guidance? A retrospective study to estimate predictors of time to guidance.**

|                                 |                                                                                                                                                                                                                       |
|---------------------------------|-----------------------------------------------------------------------------------------------------------------------------------------------------------------------------------------------------------------------|
| Journal:                        | <i>BMJ Open</i>                                                                                                                                                                                                       |
| Manuscript ID:                  | bmjopen-2012-001870.R2                                                                                                                                                                                                |
| Article Type:                   | Research                                                                                                                                                                                                              |
| Date Submitted by the Author:   | 07-Dec-2012                                                                                                                                                                                                           |
| Complete List of Authors:       | Casson, Steven; London School of Hygiene and Tropical Medicine, Ruiz, Francis; National Institute for Health and Clinical Excellence, NICE International Miners, Alec; London School of Hygiene and Tropical Medicine |
| <b>Primary Subject Heading</b>: | Health economics                                                                                                                                                                                                      |
| Secondary Subject Heading:      | Health policy, Pharmacology and therapeutics, Public health, Evidence based practice                                                                                                                                  |
| Keywords:                       | HEALTH ECONOMICS, Health policy < HEALTH SERVICES ADMINISTRATION & MANAGEMENT, Protocols & guidelines < HEALTH SERVICES ADMINISTRATION & MANAGEMENT, PUBLIC HEALTH, STATISTICS & RESEARCH METHODS                     |
|                                 |                                                                                                                                                                                                                       |

SCHOLARONE™  
Manuscripts

only

## How long has NICE taken to produce Technology Appraisal guidance? A retrospective study to estimate predictors of time to guidance

Steven G Casson MA(Cantab) MB BChir MSc MFPH<sup>1</sup>, Francis Ruiz BSc MSc<sup>2</sup>, Alec Miners BA MSc

PhD<sup>3</sup>,

<sup>1</sup> SpR in Public Health, London School of Hygiene and Tropical Medicine, Keppel Street, London WC1E

7HT, UK.

<sup>2</sup> Senior Adviser (Health Economics), NICE International, National Institute for Health and Clinical

Excellence, 71 High Holborn, London WC1V 6NE

<sup>3</sup>Lecturer in Health Economics, Faculty of Public Health and Policy, London School of Hygiene and

Tropical Medicine, Keppel Street, London WC1E 7HT, UK.

### Address correspondence to:

s.casson@nhs.net

### Contents

- Word count of abstract, article summary, introduction, methods, results, discussion and references is 3768.
- Three tables.
- One figure
- 11 references.

## Funding

This research received no specific grant from any funding agency in the public, commercial or not-for-profit sectors. It was conducted as part of a MSc degree at the London School of Hygiene and Tropical Medicine.

## Declaration of Competing Interests

SC has no relationship with NICE. AM is a current member of one of NICE's Technology Appraisal Committee's and its Technology Appraisals' Decision Support Unit. FR is a member of NICE International, a not-for-profit consultancy service within NICE. FR, SC and AM have no other non-financial interests that may be relevant to the submitted work. The views expressed in this manuscript are those of the authors alone, and do not necessarily reflect the opinion of any associated organisation.

## Ethics Statement

This project did not involve any human subjects or any human data. Therefore ethics approval was not required.

## Contributors

SC collected, processed, and analysed the data and drafted the paper. AM conceived the subject for study, provided expert opinion on methodology / approach, contributed to the statistical analysis and helped write the text. FR contributed to the writing and discussion. AM is the guarantor.

## Acknowledgements

Nina Pinwill, Associate Director at NICE, advised on appraisal processes and the selection of time points suitable for analysis. NP also provided the missing data described in the text.

## Data sharing

No further data available.

## Abstract

**Objectives:** To assess how long the UK's National Institute for Health and Clinical Excellence's (NICE) Technology Appraisal Programme has taken to produce guidance and to determine independent predictors of time to guidance.

**Design:** Retrospective time to event (survival) analysis.

**Setting:** Technology Appraisal guidance produced by NICE.

**Datasource:** All appraisals referred to NICE by February 2010 were included, except those referred prior to 2001 and a number that were suspended.

**Outcome measure:** Duration from the start of an appraisal (when the scope document was released) until publication of guidance.

**Results:** Single Technology Appraisals (STAs) were published significantly faster than Multiple Technology Appraisals (MTAs) with median durations of 48.0 (interquartile range [IQR]; 44.3 to 75.4) and 74.0 (IQR; 60.9 to 114.0) weeks respectively ( $p < 0.0001$ ). Median time to publication exceeded published process timelines, even after adjusting for appeals. Results from the modelling suggest that STAs published guidance significantly faster than MTAs after adjusting for other covariates (by 36.2 weeks [95% CI -46.05 to -26.42 weeks]) and that appeals against provisional guidance significantly increased the time to publication (by 42.83 weeks [95% CI 35.50 to 50.17 weeks]). There was no evidence that STAs of cancer-related technologies took

1  
2  
3 longer to complete compared with STAs of other technologies after adjusting for potentially  
4  
5 confounding variables and only weak evidence suggesting that the time to produce guidance is  
6  
7 increasing each year (by 1.40 weeks [95% CI -0.35 to 2.94 weeks]).  
8  
9

10  
11 **Conclusions:** The results from this study suggest that the STA process has resulted in  
12  
13 significantly faster guidance compared with the MTA process irrespective of topic, but that these  
14  
15 gains are lost if appeals are made against provisional guidance. While NICE processes  
16  
17 continue to evolve over time, a trade off might be that decisions take longer but at present there  
18  
19 is no evidence of a significant increase in duration.  
20  
21  
22  
23  
24  
25  
26

## 27 Article summary

### 28 Article focus

- 29 • How long has NICE's Technology Appraisals taken to produce guidance?
- 30 • What features of an appraisal independently predict the time to publication of guidance?

### 31 Key messages

- 32 • The STA process has reduced the time to publication by about 36 weeks irrespective of topic.
- 33 • Appeals against final appraisal determinations have more than doubled the time it takes for STAs  
34 to conclude. No other factors were strongly predictive of the time to guidance.
- 35 • No variables predicting the likelihood of an appeal were identified.

### 36 Strengths and limitations of this study

- 37 • Use of time to event analysis is a significant improvement on previous studies addressing the  
38 primary question.
- 39 • Other factors might also independently predict the time to guidance, such as consideration of  
40 patient access schemes and the number of consultees on each appraisal.  
41  
42  
43  
44  
45

## Introduction

In England and Wales, the primary role of National Institute for Health and Clinical Excellence's (NICE's) Centre for Health Technology Evaluation is to produce guidance on the appropriate use of technologies for the NHS. Prior to 2005 all appraisals were undertaken using its Multiple Technology Appraisal (MTA) process [1]. However, following criticism of the slow production of guidance [2], [3], NICE established the Single Technology Appraisal (STA) process in 2005 with the objective of producing faster guidance closer to the time of product launch [4, 5]. Both processes produce determinations intended to guide decisions on technology adoption. Both respond to the challenge of uncertainty which already exists (but has not previously been addressed) or which has been produced by the arrival of novel technology or new evidence. MTAs and STAs are largely identical in structure (but not scheduling) with the exception of the sub-process which assesses the evidence of effectiveness and cost-effectiveness. The substantive differences therein are firstly the party responsible for the assessment, and secondly the scope of the analysis. In MTA, independent reviewers produce a comparative analysis of technologies for an indication and manufacturers also submit assessments. However in STAs, manufacturers submissions are limited to the consideration of a single technology and the independent review is restricted to a critique of this submission. Precise details of both processes can be found elsewhere [1, 6]. ; STA adoption has been rapid, increasing from 13% of all technology appraisals in June 2008 to 43.4% by February 2010. STAs and MTAs should in theory take 43 and 60 weeks respectively to conclude in the absence of an appeal against the provisional guidance (more formally known as a 'final appraisal determination'). A number of studies have attempted to assess whether the processes have met these targets and whether the STA process has resulted in faster guidance [7-9]. For example, Ford et al suggests that the STA has reduced the time to produce guidance, but not for cancer-related technologies [8]. O'Neill also suggests that the STA has reduced the average

1  
2  
3 time to guidance, by approximately 1 year [9]. However, both analyses are limited. Firstly, Ford  
4 considers the time from product launch to guidance, rather than choosing a starting point on or  
5 after the point at which NICE assumes full control, and that is the date on which NICE is  
6 formally requested to appraise a technology by the Department of Health. NICE has only  
7 limited influence on the request date from the Department of Health.. Secondly, the studies only  
8 include completed appraisals; no adjustments were made for ongoing, and potentially lengthy,  
9 assessments. This means that the results could be biased. Thirdly, while Ford and O'Neill  
10 attempted to identify independent predictors of the time to guidance, none assessed these using  
11 formal statistical approaches for time to event data. Finally, no attempts were made to formally  
12 identify the individual contribution of each explanatory variable to the total time. The purpose of  
13 this study is to address all of these issues.  
14  
15  
16  
17  
18  
19  
20  
21  
22  
23  
24  
25  
26  
27  
28  
29  
30  
31  
32  
33  
34  
35  
36  
37  
38  
39  
40  
41  
42  
43  
44  
45  
46  
47  
48  
49  
50  
51  
52  
53  
54  
55  
56  
57  
58  
59  
60

## Methods

### Inclusion criteria

All appraisals referred to NICE by Feb 2010 were considered for inclusion. However, MTAs prior to 2001 were excluded as they followed a different process to more recent MTAs. Appraisals were also excluded (19 STAs and 7 MTAs) if they had been suspended or postponed following initial referral from the Department of Health but before NICE issued the final scope document.

### Key dates, durations and data sources

Data for the analysis was taken from NICE's website. A small amount of missing data (comprised of 21 start dates, 6 suspension dates, 4 appeal announcement dates, and 6 process types i.e. MTA or STA) was provided directly by NICE, on request. The 'core' appraisal time period was bounded as follows. Start dates were calculated for the majority of appraisals using the 'final scope' date, as this was the earliest consistently-recorded time point available throughout the whole dataset. This date is also in line with when NICE 'starts the clock'. The scope documents issued include information on the intervention(s) to be evaluated and the relevant comparator programmes. The time of scope document release can be viewed as a formal appraisal start date for the purposes of inviting and constructing evidenced based submissions. Where this date was unknown (for 1 STA and 6 MTAs), the start date was inferred using the 'closing date for submissions to appraisal process by consultees'. This time point is scheduled to occur at week 9 in the STA process or week 14 for a MTA. Subtraction of the relevant number of weeks (9 or 14) allowed the start of the core process to be inferred.



## Statistical analysis

The data was analysed using time to event (survival) analysis techniques with the 'event' being publication of guidance. Time to publication was initially assessed using Kaplan-Meier (KM) techniques, stratified by the parameter of interest (e.g. STA / MTA process). Statistical significance was estimated using the log-rank test. The end (censor) date was taken to be the date final guidance was published, the date an appraisal was suspended, or 13<sup>th</sup> February 2010 (the end of the data collection period), whichever occurred first. Rather than use Cox proportional hazard models to adjust KM results for multiple independent parameters, parametric techniques were instead used. This was because the latter is able to generate predictions of time to publication of guidance for censored events, and to provide direct estimations of the independent contribution of each predictive variable to the total time to guidance (i.e. the marginal effect). For example, the number of weeks an appeal has added to the length of a MTA or STA can be calculated, all other factors held constant. A number of different parametric time to event models were fitted to the data including exponential, Weibull, lognormal, loglogistic, Gompertz and gamma. The model that minimised Akaike's information criterion (AIC) was selected for use. Sensitivity analysis was also used to assess the effect of using alternative parametric model forms. Additionally, logistic regression was used to assess whether a number of independent variables predicted the likelihood of an appeal. The proportion of appraisals completing within anticipated process times (43 and 60 weeks for STAs and MTAs) were assessed by assuming a binomial distribution. All analyses were undertaken using STATA v12.

## Choice of independent variables

The choice of appraisal process (STA or MTA) was an obvious parameter for inclusion, since STAs are designed to be shorter than MTAs. Other parameters were identified using existing

1  
2  
3 literature and consideration of the underlying processes. For example, it is logical that an  
4  
5 appeal against provisional guidance could add substantially to the time it takes to publish final  
6  
7 guidance. Other authors have also suggested that cancer appraisals are typically more  
8  
9 complex and 'controversial', given that they tend to be associated with high incremental cost-  
10  
11 effectiveness ratios, meaning they take longer to complete. NICE considers revising published  
12  
13 appraisal guidance every 1-3 years. Given that in theory such revisions should be adding to an  
14  
15 existing evidence base, it was suspected that these might take a shorter time to complete  
16  
17 compared with other appraisals. O'Neill suggested that there was no evidence that appraisals  
18  
19 are generally taking longer to complete, a so called 'time-trend'. However, O'Neill also suggests  
20  
21 that this conclusion should be revisited using more formal statistical approaches.  
22  
23  
24  
25  
26

27 For these reasons, the following independent variables were included in the time to event  
28  
29 analysis and logistic regression analysis: review of existing appraisal (yes / no), drug (yes / no),  
30  
31 cancer-related topic (yes / no), whether an appeal on the final appraisal determination (yes /  
32  
33 no), calendar year of appraisal start (2001 to 2010) and an interaction term between STA and  
34  
35 cancer to test whether there was a difference between cancer-related and remaining STAs.  
36  
37 Other parameters were considered for inclusion, some of which had previously been studied.  
38  
39 These included consideration of patient access schemes, guidance that ultimately restricted the  
40  
41 use of a technology, and the number of groups (consultees) who were formally engaged with an  
42  
43 appraisal. However, such parameters were rejected from the final model because of difficulties  
44  
45 in consistently collecting this evidence. For example, a number of patient access schemes have  
46  
47 been submitted to NICE, but only more recently has this become a formal part of NICE's  
48  
49 appraisal processes.  
50  
51

52 The basic tested hypothesis was that none of the independent parameters independently  
53  
54 predicted the time to publication of guidance.  
55  
56  
57  
58  
59  
60

## Results

Data was collected on 196 appraisals, 80 STAs and 116 MTAs, that started between 2001 and 2010 (Table 1). All but one STA appraised the use of drugs, and almost 40% of all appraisals were cancer-related. Approximately half of the STAs had been published (39/80) by the time of analysis, as had 84% (97/116) of the MTAs. Over 20% (45/196) of the appraisals included at least one appeal and 15% (29/196) were reviews of existing guidance.

The estimates of process length for completed STAs (published on time: 9/39 = 23%,  $p=0.001$ ) and MTAs (19/97 = 20%,  $p<0.001$ ) exceeded NICE's timetabled targets of 43 and 60 weeks respectively with corresponding median times of 45.4 (IQR 43.3 to 55.9) and 69.6 weeks (IQR 60.9 to 111.1). The proportion of appraisals from both processes continued to exceed published timelines after removing appraisals containing appeals ( $p<0.01$  in both instances), although the median times were much closer to target levels (STA median 44.8 weeks, IQR 42.3 to 48.0; MTA median 61.6 weeks, IQR 57.7 to 71.1).

Results from the KM analysis showed that production of guidance was significantly faster for STAs than for MTAs; the median time to guidance was 48.0 weeks (interquartile range [IQR] 44.3 to 75.4) and 74.0 weeks (IQR; 60.9 to 114.0) for the STA and MTA processes respectively ( $p\text{-value}<0.0001$ , Figure 1). Further stratified analysis (Table 2) suggested that appeals significantly extended the time to guidance for both MTAs and STAs ( $p<0.001$ ), and that cancer-related STAs were significantly longer compared with non-cancer STAs ( $p=0.02$ ). None of the remaining comparisons were statistically significant.

Results from the multivariate parametric modelling suggested that the loglogistic model was the most appropriate to use. STA and appeals were shown to be associated with faster and slower

1  
2  
3 times to guidance respectively (Table 3). None of the remaining variables were significantly  
4  
5 associated with the time to guidance although there was weak evidence of a yearly increase in  
6  
7 the time it has taken to publish guidance (1.40 weeks [95% CI -0.35 to 2.94 weeks]). Sensitivity  
8  
9 analysis using different distributional forms had negligible effects on the results. None of the  
10  
11 covariates were found to be predictive of the likelihood of an appeal (data not shown).  
12  
13  
14  
15  
16  
17  
18  
19  
20  
21  
22  
23  
24  
25  
26  
27  
28  
29  
30  
31  
32  
33  
34  
35  
36  
37  
38  
39  
40  
41  
42  
43  
44  
45  
46  
47  
48  
49  
50  
51  
52  
53  
54  
55  
56  
57  
58  
59  
60

For peer review only

## Discussion

The results from this analysis show that NICE's STA process produced much faster guidance to the NHS compared with the MTA process, by about 35 weeks. But appeals against provisional guidance, when they occurred, more than offset this gain. The results from the KM analysis suggested that cancer-related STAs were longer than non-cancer STAs. However, the difference was no longer statistically significant when adjustments were made for other variables. The evidence that each year appraisal length is independently increasing is weak at best (increase of 1.40 weeks [95% CI -0.35 to 2.94 weeks]). Variables indicating whether a technology was a drug or a review of existing guidance were not predictive of the time to guidance.

### How does this compare to other studies?

The percentages of MTAs and STAs completing within timetabled targets are consistent with those reported by O'Neill et al [9]. While the estimates of STA duration were also similar, the time taken to produce MTAs was not; O'Neill and colleagues stated an average duration of about 100 weeks whereas our unadjusted estimate was nearer to 74 weeks indicating a much smaller difference between the two process types. It is possible that methodological differences could explain these findings. For example, MTAs appraise the use of more than one technology. O'Neill considered each technology within a MTA to represent a discrete decision, thus an appraisal with three recommendations was effectively taken to be equivalent to three appraisals. In this study each appraisal was taken to represent a single event irrespective of the number of recommendations it contained. However, irrespective of the best approach, it should be noted that NICE clearly states published timelines represent a *minimum* amount of time to publication and that the median times were within 2 weeks of target levels when appraisals containing appeals were removed from our analysis.

1  
2  
3 O'Neill et al [9] reported that STAs were substantially faster than MTAs. The unadjusted  
4  
5 analysis of Ford et al [8] also suggests that STAs have reduced the time to guidance compared  
6  
7 with MTAs, but not for STAs of cancer-related technologies. We agree with the general finding  
8  
9 that the STA has significantly reduced the time to guidance. However, while our unadjusted KM  
10  
11 analysis also suggests STAs of cancer-related technologies were slower to complete compared  
12  
13 with their non-cancer related counterparts, the difference was no longer significant when  
14  
15 adjustments were made for other variables, including appeals.  
16  
17  
18  
19

20  
21 Both O'Neill and Ford include analyses that estimate the time between product launch and  
22  
23 production of guidance by NICE, presumably because a specific objective of the STA process is  
24  
25 to minimise this time period. However, our analysis used the point at which NICE issued its final  
26  
27 scope as the appraisal starting point. We elected not to use the time of product launch for a  
28  
29 number of reasons. Firstly, the date is difficult to measure accurately and specifically, as there  
30  
31 is no readily available source of indication-specific license dates. Secondly, the time from  
32  
33 product launch to start of the NICE process is largely outside of NICE's control. Thirdly, and  
34  
35 perhaps most importantly, the duration derived from use of the launch date often has little  
36  
37 meaning. For example, guidance on the use of vinorelbine for advanced breast cancer (TA 54)  
38  
39 [10] was published in 2002, whereas its marketing authorisation was issued in 1997, two years  
40  
41 before NICE existed.  
42  
43  
44  
45

46  
47 O'Neill et al cautiously stated that there was no evidence that either the STA or MTA have  
48  
49 increased in length over time. We agree with this conclusion.  
50

## 51 **Strengths and limitations**

52  
53  
54 The main strength of this analysis compared with previous studies is that it uses formal time to  
55  
56 event analysis techniques to assess the time to publication of guidance. In doing so,  
57  
58  
59  
60

1  
2  
3 adjustments are made for potentially confounding variables and estimates of the marginal  
4 contribution of each variable to the total time are generated. This said, there are a number of  
5 limitations. Firstly, the start of each appraisal was taken to be the time at which consultees are  
6 formally invited to submit evidence, set as the time at which the final scope document is issued.  
7 An alternative viewpoint could be that since NICE consults on scope documents, appraisals in  
8 some senses start about 3 months earlier, even though there is no guarantee during the  
9 consultation that the appraisal will proceed. While including this extra time would increase the  
10 median time to guidance, it is unlikely to alter the predictive value of the explanatory variables.  
11 Secondly, no account was taken of interruptions that were outside of NICE's control, such as  
12 public holidays or publication embargos during general elections; the latter can be lengthy.  
13 Thirdly, MTAs usually result in guidance that relates to the use of more than one technology. In  
14 this analysis all appraisals have been treated as equal, in so much that no account has been  
15 made of the number of technologies being appraised. However, it is conceivable that one MTA  
16 of (say) three technologies could be shorter, in terms of calendar time, than three separate  
17 STAs. This could mean that comparisons of the two processes should be treated with some  
18 caution. Fourthly, there is a potential issue of endogeneity in the statistical analysis since it is  
19 possible that appeals are at least partly a result of the other independent variables. While this  
20 cannot be completely ruled out, none of the examined variables were independently predictive  
21 of an appeal, thus we think this issue is unlikely to be important. Lastly, although it is likely that  
22 other variables may be related to the time to guidance, there are challenges in quantifying them.  
23 One such example is the number or mix of consultees, which could reflect the complexity / level  
24 of interest in a particular area. We could not find a reliable method of quantifying this potential  
25 predictor of time to guidance; patient groups often produce joint submissions, and only the  
26 product manufacturer is officially a consultee in a STA.  
27 It has also been suggested that the scale of the evidence base could act as a predictor of  
28 duration. However, the conceptual nature of any such relationship is not clear. One hypothesis  
29  
30  
31  
32  
33  
34  
35  
36  
37  
38  
39  
40  
41  
42  
43  
44  
45  
46  
47  
48  
49  
50  
51  
52  
53  
54  
55  
56  
57  
58  
59  
60

1  
2  
3 could be that where there exists only a small number of trials, the time to guidance would be  
4 shorter. However Ford et al [8] suggest an alternative hypothesis. They suggest that a limited  
5 evidence base can produce uncertainties in cost-effectiveness data, causing problems in setting  
6 start/stop prescribing rules. Such a “challenge to the appraisal committee” could result in a  
7 request for further information and consequential delays i.e. increased time to guidance. The  
8 question of whether such an association exists would be best answered using a range of  
9 qualitative and quantitative methods and goes beyond the scope of this study.

10  
11 Concerns have previously been raised about the variable quality of manufacturer submissions  
12 to the STA process [5] and cost-effectiveness estimates generated by manufacturer's are often  
13 more favourable than those provided by independent academic groups [11]. This analysis says  
14 nothing about the quality of submissions. But we would suggest that any potential short  
15 comings with the STA process are not necessarily confined to the independence of the HTA  
16 dossier; rather they are arguably equally or more likely to reflect restricted scopes, in terms of  
17 comparator technologies, and the relative immaturity of the evidence base, as STAs are  
18 increasingly aligned with a product's launch. Whether or not this is true, there remains an  
19 important debate to be had about the speed of HTA production, the potential trade-off in terms  
20 of comprehensiveness of the compiled evidence base, and whether policy recommendations  
21 are materially affected.

## 22 **Conclusion and recommendation**

23  
24 In summary, the evidence suggests that despite the incorporation of more detailed methods and  
25 processes over the past decade, the time it has taken NICE to produce guidance over the past  
26 decade has not independently increased. The introduction of the STA process has resulted in  
27 the production of significantly faster guidance to the NHS, irrespective of clinical topic.

28  
29 However, appeals when they occur can significantly extend this time. We therefore recommend



1  
2  
3 that where possible, efforts be made to develop working practices and processes which can  
4  
5 reduce the need for such appeals.  
6  
7  
8  
9  
10  
11  
12  
13  
14  
15  
16  
17  
18  
19  
20  
21  
22  
23  
24  
25  
26  
27  
28  
29  
30  
31  
32  
33  
34  
35  
36  
37  
38  
39  
40  
41  
42  
43  
44  
45  
46  
47  
48  
49  
50  
51  
52  
53  
54  
55  
56  
57  
58  
59  
60

For peer review only

## References

1. National Institute for Health and Clinical Excellence, *Guide to the multiple technology appraisal process*, 2009.
2. Mayor, S., *NICE to issue faster guidance to the NHS*. *BMJ*, 2005. **331**: p. 1101.
3. Haycox, A., *Does 'NICE blight' exist, and if so, why?* *Pharmacoeconomics*. *Pharmacoeconomics*, 2008. **26**: p. 987-989.
4. NICE, *Guide to the single technology appraisal process*, 2009, National Institute for Health and Clinical Excellence,.
5. Wailoo, A. and C. Pickstone, *A Review Of The Nice Single Technology Appraisal Process*, 2008, School of Health and Related Research, University of Sheffield (Decision Support Unit),.
6. National Institute for Health and Clinical Excellence, *Guide to the single technology appraisal process*, 2009.
7. Barham, L., *Single Technology Appraisals by NICE -- are they delivering faster guidance to the NHS?* *Pharmacoeconomics*, 2008. **26**: p. 1037-43.
8. Ford, J.A., et al., *NICE guidance: a comparative study of the introduction of the single technology appraisal process and comparison with guidance from Scottish Medicines Consortium*. *BMJ Open*, 2012. **2**(1).
9. O'Neill, P., N. Devlin, and Puig-Peró, *Time trends in NICE HTA decisions*, in *Consulting report 2012*, Office of Health Economics: London.
10. National Institute for Health and Clinical Excellence. *Guidance on the use of vinorelbine for the treatment of advanced breast cancer*. Technology Appraisal Guidance 2002 01/01/2012]; Available from: <http://guidance.nice.org.uk/TA54>.
11. Miners AH, Garau M, Fidan D, et al. Comparing estimates of cost effectiveness submitted to the National Institute for Clinical Excellence (NICE) by different organisations: retrospective study. *BMJ*, 2005. 330:65.

## Tables

Table 1: Appraisals included in the analysis (n=196)

| Variable                     | STA | MTA |
|------------------------------|-----|-----|
| n                            | 80  | 116 |
| Guidance published*          | 39  | 97  |
| Appraisal suspended*         | 8   | 14  |
| Appraisal of a drug or drugs | 79  | 73  |
| Appraisal cancer-related     | 47  | 29  |
| At least one appeal**        | 9   | 36  |
| Review                       | 3   | 26  |

\*at the time the analysis was undertaken

\*\*appeals are made by consultees (often the producer of the technology) against final appraisal determinations, that is, NICE's provisional guidance. See XX for further details.

Table 2. Results of Kaplan Meier analysis (weeks), log-rank tests of equality of survivor functions

| Strata            | MTA n=116 |                       |         | STA n=80 |                      |         |
|-------------------|-----------|-----------------------|---------|----------|----------------------|---------|
|                   | N         | Median (IQR)          | p-value | N        | Median (IQR)         | p-value |
| <b>Cancer</b>     | 23        | 66.5 (60.6 to 111.1)  |         | 18       | 57.0 (42.3 to 87.9)  |         |
| <b>No Cancer</b>  | 74        | 74.0 (61.4 to 116.1)  | 0.43    | 21       | 45.4 (44.7 to 55.7)  | 0.02    |
| <b>Review</b>     | 17        | 68.4 (61.4 to 111.1)  |         | 1        | 44.1 (N/A)           |         |
| <b>Non review</b> | 80        | 74.0 (60.9 to 116.4)  | 0.65    | 38       | 51.0 (44.7 to 75.4)  | 0.18    |
| <b>Drug</b>       | 59        | 77.6 (62.4 to 116.3)  |         | 39       | 48.0 (44.3 to 75.4)  |         |
| <b>Non drug</b>   | 38        | 66.6 (57.7 to 91.8)   | 0.11    | 0        | N/A                  | -       |
| <b>Appeal*</b>    | 35        | 116.1 (91.9 to 136.9) |         | 7        | 76.7 (65.0 to 105.3) |         |
| <b>No appeal</b>  | 62        | 61.6 (57.7 to 71.1)   | <0.001  | 32       | 44.9 (42.3 to 48.0)  | <0.001  |

\*Indicates at least one appeal; IQR, interquartile range; N indicates observed events; N/A, not applicable

Table 3: Results from the loglogistic modelling

| Variable               | Coefficient | 95% CI         | p-value | Marginal effect<br>(weeks) <sup>†</sup> | 95% CI           |
|------------------------|-------------|----------------|---------|-----------------------------------------|------------------|
| <b>STA*</b>            | -0.49       | -0.62 to -0.36 | <0.001  | -36.2                                   | -46.05 to -26.42 |
| <b>Cancer*</b>         | -0.03       | -0.002 to 0.04 | 0.60    | -2.06                                   | -9.80 to 5.70    |
| <b>STA x cancer</b>    | 0.13        | -0.05 to 0.30  | 0.15    | 9.23                                    | -3.36 to 21.81   |
| <b>Drug*</b>           | 0.08        | -0.01 to 0.20  | 0.08    | 6.10                                    | -0.75 to 12.87   |
| <b>Review*</b>         | -0.04       | -0.12 to 0.07  | 0.43    | -3.26                                   | -11.39 to 4.87   |
| <b>Ever an appeal*</b> | 0.60        | 0.50 to 0.67   | <0.001  | 42.83                                   | 35.50 to 50.17   |
| <b>Year started**</b>  | 0.02        | -0.002 to 0.04 | 0.073   | 1.40                                    | -0.35 to 2.94    |
| <b>Ln_gamma</b>        | -2.06       | -2.20 to -1.91 | <0.001  | -                                       | -                |

Log likelihood = 2.23; constant = 4.04; \*yes = 1, no =0; \*\*where values range between (20)1 and (20)10;

<sup>†</sup>indicates the independent contribution to the median to time to publication;  $\beta$  values less than 0 indicate variables are associated with a shorter time to guidance; CI – confidence interval

1  
2  
3  
4  
5  
6  
7  
8  
9  
10  
11  
12  
13  
14  
15  
16  
17  
18  
19  
20  
21  
22  
23  
24  
25  
26  
27  
28  
29  
30  
31  
32  
33  
34  
35  
36  
37  
38  
39  
40  
41  
42  
43  
44  
45  
46  
47  
48  
49  
50  
51  
52  
53  
54  
55  
56  
57  
58  
59  
60

**Figures**

Figure 1. Kaplan-Meier time to event estimate of time to publication of guidance

For peer review only

## How long has NICE taken to produce Technology Appraisal guidance? A retrospective study to estimate predictors of time to guidance

Steven G Casson MA(Cantab) MB BChir MSc MFPH<sup>1</sup>, Francis Ruiz BSc MSc<sup>2</sup>, Alec Miners BA MSc PhD<sup>3</sup>,

<sup>1</sup> SpR in Public Health, London School of Hygiene and Tropical Medicine, Keppel Street, London WC1E 7HT, UK.

<sup>2</sup> Senior Adviser (Health Economics), NICE International, National Institute for Health and Clinical Excellence, 71 High Holborn, London WC1V 6NE

<sup>3</sup> Lecturer in Health Economics, Faculty of Public Health and Policy, London School of Hygiene and Tropical Medicine, Keppel Street, London WC1E 7HT, UK.

### Address correspondence to:

s.casson@nhs.net

### Contents

- Word count of abstract, article summary, introduction, methods, results, discussion and references is 3768599.
- Three tables.
- One figure
- 11 references.

## Funding

This research received no specific grant from any funding agency in the public, commercial or not-for-profit sectors. It was conducted as part of an MSc degree at the [London School of Hygiene and Tropical Medicine, LSHTM](#).

## Declaration of Competing Interests

SC has no relationship with NICE. AM is a current member of one of NICE's Technology Appraisal Committee's and its Technology Appraisals' Decision Support Unit. FR is a member of NICE International, a not-for-profit consultancy service within NICE. FR, SC and AM have no other non-financial interests that may be relevant to the submitted work. The views expressed in this manuscript are those of the authors alone, and do not necessarily reflect the opinion of any associated organisation.

## Ethics Statement

This project did not involve any human subjects or any human data. Therefore ethics approval was not required.

## Contributors

SC collected, processed, and analysed the data and drafted the paper. AM conceived the subject for study, provided expert opinion on methodology / approach, contributed to the statistical analysis and helped write the text. FR contributed to the writing and discussion. AM is the guarantor.

## Acknowledgements

Nina Pinwill, Associate Director at NICE, advised on appraisal processes and the selection of time points suitable for analysis. NP also provided the missing data described in the text.

## Data sharing

No further data available.



## Abstract

**Objectives:** To assess how long the UK's National Institute for Health and Clinical Excellence's (NICE) Technology Appraisal Programme has taken to produce guidance and to determine independent predictors of time to guidance.

**Design:** Retrospective time to event (survival) analysis.

**Setting:** Technology Appraisal guidance produced by NICE.

**Datasource:** All appraisals referred to NICE by February 2010 were included, except those referred prior to 2001 and a number that were suspended.

**Outcome measure:** Duration from the start of an appraisal (when the scope document was released) until publication of guidance.

**Results:** Single Technology Appraisals (STAs) were published significantly faster than Multiple Technology Appraisals (MTAs) with median durations of 48.0 (interquartile range [IQR]; 44.3 to 75.4) and 74.0 (IQR; 60.9 to 114.0) weeks respectively ( $p < 0.0001$ ). Median time to publication exceeded published process timelines, even after adjusting for appeals. Results from the modelling suggest that STAs published guidance significantly faster than MTAs after adjusting for other covariates (by 36.2 weeks [95% CI -46.05 to -26.42 weeks]) and that appeals against provisional guidance significantly increased the time to publication (by 42.83 weeks [95% CI 35.50 to 50.17 weeks]). There was no evidence that STAs of cancer-related technologies took

1  
2  
3 longer to complete compared with STAs of other technologies after adjusting for potentially  
4  
5 confounding variables and only weak evidence suggesting that the time to produce guidance is  
6  
7 increasing each year (by 1.40 weeks [95% CI -0.35 to 2.94 weeks]).  
8  
9

10  
11 **Conclusions:** The results from this study suggest that the STA process has resulted in  
12  
13 significantly faster guidance compared with the MTA process irrespective of topic, but that these  
14  
15 gains are lost if appeals are made against provisional guidance. While NICE processes  
16  
17 continue to evolve over time, a trade off might be that decisions take longer but at present there  
18  
19 is no evidence of a significant increase in duration.  
20  
21  
22  
23  
24  
25  
26

## 27 Article summary

### 28 Article focus

- 29 • How long has NICE's Technology Appraisals taken to produce guidance?
- 30 • What features of an appraisal independently predict the time to publication of guidance?

### 31 Key messages

- 32 • The STA process has reduced the time to publication by about 36 weeks irrespective of topic.
- 33 • Appeals against final appraisal determinations have more than doubled the time it takes for STAs  
34 to conclude. No other factors were strongly predictive of the time to guidance.
- 35 • No variables predicting the likelihood of an appeal were identified.

### 36 Strengths and limitations of this study

- 37 • Use of time to event analysis is a significant improvement on previous studies addressing the  
38 primary question.
- 39 • Other factors might also independently predict the time to guidance, such as consideration of  
40 patient access schemes and the number of consultees on each appraisal.  
41  
42  
43  
44  
45

## Introduction

In England and Wales, the primary role of National Institute for Health and Clinical Excellence's (NICE's) Centre for Health Technology Evaluation is to produce guidance on the appropriate use of technologies for the NHS. Prior to 2005 all appraisals were undertaken using its Multiple Technology Appraisal (MTA) process [1]. However, following criticism of the slow production of guidance [2], [3], NICE established the Single Technology Appraisal (STA) process in 2005 with the objective of producing faster guidance closer to the time of product launch [4, 5]. Both processes produce determinations intended to guide decisions on technology adoption. Both respond to the challenge of uncertainty which already exists (but has not previously been addressed) or which has been produced by the arrival of novel technology or new evidence. MTAs and STAs are largely identical in structure (but not scheduling) with the exception of the sub-process which assesses the evidence of effectiveness and cost-effectiveness. The substantive differences therein are firstly the party responsible for the assessment, and secondly the scope of the analysis. In MTA, independent reviewers produce a comparative analysis of technologies for an indication and manufacturers also submit assessments. However in STAs, manufacturers submissions are limited to the consideration of a single technology and the independent review is restricted to a critique of this submission. Precise details of both processes can be found elsewhere [1, 6]. ; STA adoption has been rapid, increasing from 13% of all technology appraisals in June 2008 to 43.4% by February 2010. STAs and MTAs should in theory take 43 and 60 weeks respectively to conclude in the absence of an appeal against the provisional guidance (more formally known as a 'final appraisal determination'). A number of studies have attempted to assess whether the processes have met these targets and whether the STA process has resulted in faster guidance [7-9]. For example, Ford et al suggests that the STA has reduced the time to produce guidance, but not for cancer-related technologies [8]. O'Neill also suggests that the STA has reduced the average

1  
2  
3 time to guidance, by approximately 1 year [9]. However, both analyses are limited. Firstly, Ford  
4  
5 considers the time from product launch to guidance, rather than choosing a starting point on or  
6  
7 after the point at which NICE assumes full control, and that is the date on which NICE is  
8  
9 formally requested to appraise a technology by the Department of Health. NICE has only  
10  
11 limited influence on the request date from the Department of Health.. Secondly, the studies only  
12  
13 include completed appraisals; no adjustments were made for ongoing, and potentially lengthy,  
14  
15 assessments. This means that the results could be biased. Thirdly, while Ford and O'Neill  
16  
17 attempted to identify independent predictors of the time to guidance, none assessed these using  
18  
19 formal statistical approaches for time to event data. Finally, no attempts were made to formally  
20  
21 identify the individual contribution of each explanatory variable to the total time. The purpose of  
22  
23 this study is to address all of these issues.  
24  
25  
26  
27  
28  
29  
30  
31  
32  
33  
34  
35  
36  
37  
38  
39  
40  
41  
42  
43  
44  
45  
46  
47  
48  
49  
50  
51  
52  
53  
54  
55  
56  
57  
58  
59  
60

## Methods

### Inclusion criteria

All appraisals referred to NICE by Feb 2010 were considered for inclusion. However, MTAs prior to 2001 were excluded as they followed a different process to more recent MTAs. Appraisals were also excluded (19 STAs and 7 MTAs) if they had been suspended or postponed following initial referral from the Department of Health but before NICE issued the final scope document.

### Key dates, durations and data sources

Data for the analysis was taken from NICE's website. A small amount of missing data (comprised of 21 start dates, 6 suspension dates, 4 appeal announcement dates, and 6 process types i.e. MTA or STA) was provided directly by NICE, on request. The 'core' appraisal time period was bounded as follows. Start dates were calculated for the majority of appraisals using the *'final scope'* date, as this was the earliest consistently-recorded time point available throughout the whole dataset. This date is also in line with when NICE 'starts the clock'. The scope documents issued include information on the intervention(s) to be evaluated and the relevant comparator programmes. The time of scope document release can be viewed as a formal appraisal start date for the purposes of inviting and constructing evidenced based submissions. Where this date was unknown (for 1 STA and 6 MTAs), the start date was inferred using the *'closing date for submissions to appraisal process by consultees'*. This time point is scheduled to occur at week 9 in the STA process or week 14 for a MTA. Subtraction of the relevant number of weeks (9 or 14) allowed the start of the core process to be inferred.

### Statistical analysis

The data was analysed using time to event (survival) analysis techniques with the 'event' being publication of guidance. Time to publication was initially assessed using Kaplan-Meier (KM) techniques, stratified by the parameter of interest (e.g. STA / MTA process). Statistical significance was estimated using the log-rank test. The end (censor) date was taken to be the date final guidance was published, the date an appraisal was suspended, or 13<sup>th</sup> February 2010 (the end of the data collection period), whichever occurred first. Rather than use Cox proportional hazard models to adjust KM results for multiple independent parameters, parametric techniques were instead used. This was because the latter is able to generate predictions of time to publication of guidance for censored events, and to provide direct estimations of the independent contribution of each predictive variable to the total time to guidance (i.e. the marginal effect). For example, the number of weeks an appeal has added to the length of a MTA or STA can be calculated, all other factors held constant. A number of different parametric time to event models were fitted to the data including exponential, Weibull, lognormal, loglogistic, Gompertz and gamma. The model that minimised Akaike's information criterion (AIC) was selected for use. Sensitivity analysis was also used to assess the effect of using alternative parametric model forms. Additionally, logistic regression was used to assess whether a number of independent variables predicted the likelihood of an appeal. The proportion of appraisals completing within anticipated process times (43 and 60 weeks for STAs and MTAs) were assessed by assuming a binomial distribution. All analyses were undertaken using STATA v12.

### Choice of independent variables

The choice of appraisal process (STA or MTA) was an obvious parameter for inclusion, since STAs are designed to be shorter than MTAs. Other parameters were identified using existing

1  
2  
3 literature and consideration of the underlying processes. For example, it is logical that an  
4 appeal against provisional guidance could add substantially to the time it takes to publish final  
5 guidance. Other authors have also suggested that cancer appraisals are typically more  
6 complex and 'controversial', given that they tend to be associated with high incremental cost-  
7 effectiveness ratios, meaning they take longer to complete. NICE considers revising published  
8 appraisal guidance every 1-3 years. Given that in theory such revisions should be adding to an  
9 existing evidence base, it was suspected that these might take a shorter time to complete  
10 compared with other appraisals. O'Neill suggested that there was no evidence that appraisals  
11 are generally taking longer to complete, a so called 'time-trend'. However, O'Neill also suggests  
12 that this conclusion should be revisited using more formal statistical approaches.  
13  
14  
15  
16  
17  
18  
19  
20  
21  
22  
23  
24  
25  
26

27 For these reasons, the following independent variables were included in the time to event  
28 analysis and logistic regression analysis: review of existing appraisal (yes / no), drug (yes / no),  
29 cancer-related topic (yes / no), whether an appeal on the final appraisal determination (yes /  
30 no), calendar year of appraisal start (2001 to 2010) and an interaction term between STA and  
31 cancer to test whether there was a difference between cancer-related and remaining STAs.  
32 Other parameters were considered for inclusion, some of which had previously been studied.  
33 These included consideration of patient access schemes, guidance that ultimately restricted the  
34 use of a technology, and the number of groups (consultees) who were formally engaged with an  
35 appraisal. However, such parameters were rejected from the final model because of difficulties  
36 in consistently collecting this evidence. For example, a number of patient access schemes have  
37 been submitted to NICE, but only more recently has this become a formal part of NICE's  
38 appraisal processes.  
39  
40  
41  
42  
43  
44  
45  
46  
47  
48  
49  
50  
51  
52

53 The basic tested hypothesis was that none of the independent parameters independently  
54 predicted the time to publication of guidance.  
55  
56  
57  
58  
59  
60

## Results

Data was collected on 196 appraisals, 80 STAs and 116 MTAs, that started between 2001 and 2010 (Table 1). All but one STA appraised the use of drugs, and almost 40% of all appraisals were cancer-related. Approximately half of the STAs had been published (39/80) by the time of analysis, as had 84% (97/116) of the MTAs. Over 20% (45/196) of the appraisals included at least one appeal and 15% (29/196) were reviews of existing guidance.

The estimates of process length for completed STAs (published on time: 9/39 = 23%,  $p=0.001$ ) and MTAs (19/97 = 20%,  $p<0.001$ ) exceeded NICE's timetabled targets of 43 and 60 weeks respectively with corresponding median times of 45.4 (IQR 43.3 to 55.9) and 69.6 weeks (IQR 60.9 to 111.1). The proportion of appraisals from both processes continued to exceed published timelines after removing appraisals containing appeals ( $p<0.01$  in both instances), although the median times were much closer to target levels (STA median 44.8 weeks, IQR 42.3 to 48.0; MTA median 61.6 weeks, IQR 57.7 to 71.1).

Results from the KM analysis showed that production of guidance was significantly faster for STAs than for MTAs; the median time to guidance was 48.0 weeks (interquartile range [IQR] 44.3 to 75.4) and 74.0 weeks (IQR; 60.9 to 114.0) for the STA and MTA processes respectively ( $p\text{-value}<0.0001$ , Figure 1). Further stratified analysis (Table 2) suggested that appeals significantly extended the time to guidance for both MTAs and STAs ( $p<0.001$ ), and that cancer-related STAs were significantly longer compared with non-cancer STAs ( $p=0.02$ ). None of the remaining comparisons were statistically significant.

Results from the multivariate parametric modelling suggested that the loglogistic model was the most appropriate to use. STA and appeals were shown to be associated with faster and slower



1  
2  
3 times to guidance respectively (Table 3). None of the remaining variables were significantly  
4  
5 associated with the time to guidance although there was weak evidence of a yearly increase in  
6  
7 the time it has taken to publish guidance (1.40 weeks [95% CI -0.35 to 2.94 weeks]). Sensitivity  
8  
9 analysis using different distributional forms had negligible effects on the results. None of the  
10  
11 covariates were found to be predictive of the likelihood of an appeal (data not shown).  
12  
13  
14  
15  
16  
17  
18  
19  
20  
21  
22  
23  
24  
25  
26  
27  
28  
29  
30  
31  
32  
33  
34  
35  
36  
37  
38  
39  
40  
41  
42  
43  
44  
45  
46  
47  
48  
49  
50  
51  
52  
53  
54  
55  
56  
57  
58  
59  
60

For peer review only

## Discussion

The results from this analysis show that NICE's STA process produced much faster guidance to the NHS compared with the MTA process, by about 35 weeks. But appeals against provisional guidance, when they occurred, more than offset this gain. The results from the KM analysis suggested that cancer-related STAs were longer than non-cancer STAs. However, the difference was no longer statistically significant when adjustments were made for other variables. The evidence that each year appraisal length is independently increasing is weak at best (increase of 1.40 weeks [95% CI -0.35 to 2.94 weeks]). Variables indicating whether a technology was a drug or a review of existing guidance were not predictive of the time to guidance.

### How does this compare to other studies?

The percentages of MTAs and STAs completing within timetabled targets are consistent with those reported by O'Neill et al [9]. While the estimates of STA duration were also similar, the time taken to produce MTAs was not; O'Neill and colleagues stated an [average](#) duration of about 100 weeks whereas our unadjusted estimate was nearer to 74 weeks indicating a much smaller difference between the two process types. It is possible that methodological differences could explain these findings. For example, MTAs appraise the use of more than one technology. O'Neill considered each technology within a MTA to represent a discrete decision, thus an appraisal with three recommendations was effectively taken to be equivalent to three appraisals. In this study each appraisal was taken to represent a single event irrespective of the number of recommendations it contained. However, irrespective of the best approach, it should be noted that NICE clearly states published timelines represent a *minimum* amount of time to publication and that the median times were within 2 weeks of target levels when appraisals containing appeals were removed from our analysis.

1  
2  
3 O'Neill et al [9] reported that STAs were substantially faster than MTAs. The unadjusted  
4  
5 analysis of Ford et al [8] also suggests that STAs have reduced the time to guidance compared  
6  
7 with MTAs, but not for STAs of cancer-related technologies. We agree with the general finding  
8  
9 that the STA has significantly reduced the time to guidance. However, while our unadjusted KM  
10  
11 analysis also suggests STAs of cancer-related technologies were slower to complete compared  
12  
13 with their non-cancer related counterparts, the difference was no longer significant when  
14  
15 adjustments were made for other variables, including appeals.  
16  
17  
18  
19

20  
21 Both O'Neill and Ford include analyses that estimate the time between product launch and  
22  
23 production of guidance by NICE, presumably because a specific objective of the STA process is  
24  
25 to minimise this time period. However, our analysis used the point at which NICE issued its final  
26  
27 scope as the appraisal starting point. We elected not to use the time of product launch for a  
28  
29 number of reasons. Firstly, the date is difficult to measure accurately and specifically, as there  
30  
31 is no readily available source of indication-specific license dates. Secondly, the time from  
32  
33 product launch to start of the NICE process is largely outside of NICE's control. Thirdly, and  
34  
35 perhaps most importantly, the duration derived from use of the launch date often has little  
36  
37 meaning. For example, guidance on the use of vinorelbine for advanced breast cancer (TA 54)  
38  
39 [10] was published in 2002, whereas its marketing authorisation was issued in 1997, two years  
40  
41 before NICE existed.  
42  
43  
44  
45

46  
47 O'Neill et al cautiously stated that there was no evidence that either the STA or MTA have  
48  
49 increased in length over time. We agree with this conclusion.  
50

## 51 **Strengths and limitations**

52  
53  
54 The main strength of this analysis compared with previous studies is that it uses formal time to  
55  
56 event analysis techniques to assess the time to publication of guidance. In doing so,  
57  
58  
59  
60

1  
2  
3 adjustments are made for potentially confounding variables and estimates of the marginal  
4 contribution of each variable to the total time are generated. This said, there are a number of  
5 limitations. Firstly, the start of each appraisal was taken to be the time at which consultees are  
6 formally invited to submit evidence, set as the time at which the final scope document is issued.  
7 An alternative viewpoint could be that since NICE consults on scope documents, appraisals in  
8 some senses start about 3 months earlier, ~~+~~ even though there is no guarantee during the  
9 consultation that the appraisal will proceed. While including this extra time would increase the  
10 median time to guidance, it is unlikely to alter the predictive value of the explanatory variables.  
11 Secondly, no account was taken of interruptions that were outside of NICE's control, such as  
12 public holidays or publication embargos during general elections; the latter can be lengthy.  
13 Thirdly, MTAs usually result in guidance that relates to the use of more than one technology. In  
14 this analysis all appraisals have been treated as equal, in so much that no account has been  
15 made of the number of technologies being appraised. However, it is conceivable that one MTA  
16 of (say) three technologies could be shorter, in terms of calendar time, than three separate  
17 STAs. This could mean that comparisons of the two processes should be treated with some  
18 caution. Fourthly, there is a potential issue of endogeneity in the statistical analysis since it is  
19 possible that appeals are at least partly a result of the other independent variables. While this  
20 cannot be completely ruled out, none of the examined variables were independently predictive  
21 of an appeal, thus we think this issue is unlikely to be important. Lastly, although it is likely that  
22 other variables may be related to the time to guidance, there are ~~often~~ challenges in quantifying  
23 them. One such example is the number or mix of consultees, which could reflect the complexity  
24 / level of interest in a particular area. We could not find a reliable method of quantifying this  
25 potential predictor of time to guidance; patient groups often produce joint submissions, and only  
26 the product manufacturer is officially a consultee in a STA.  
27 It has also been suggested that the scale of the evidence base could act as a predictor of  
28 duration. However, the conceptual nature of any such relationship is not clear. One hypothesis  
29  
30  
31  
32  
33  
34  
35  
36  
37  
38  
39  
40  
41  
42  
43  
44  
45  
46  
47  
48  
49  
50  
51  
52  
53  
54  
55  
56  
57  
58  
59  
60

1  
2  
3 could be that where there exists only a small number of trials, the time to guidance would be  
4  
5 shorter. However Ford et al [8] suggest an alternative hypothesis. They suggest that a limited  
6  
7 evidence base can produce uncertainties in cost-effectiveness data, causing problems in setting  
8  
9 start/stop prescribing rules. Such a “challenge to the appraisal committee” could result in a  
10  
11 request for further information and consequential delays i.e. increased time to guidance. The  
12  
13 question of whether such an association exists would be best answered using a range of  
14  
15 qualitative and quantitative methods and goes beyond the scope of this study.  
16  
17

18 Concerns have previously been raised about the variable quality of manufacturer submissions  
19 to the STA process [5] and cost-effectiveness estimates generated by manufacturer's are often  
20 more favourable than those provided by independent academic groups [11]. This analysis says  
21 nothing about the quality of submissions. But we would suggest that any potential short  
22 comings with the STA process are not necessarily confined to the independence of the HTA  
23 dossier; rather they are arguably equally or more likely to reflect restricted scopes, in terms of  
24 comparator technologies, and the relative immaturity of the evidence base, as STAs are  
25 increasingly aligned with a product's launch. Whether or not this is true, there remains an  
26 important debate to be had about the speed of HTA production, the potential trade-off in terms  
27 of comprehensiveness of the compiled evidence base, and whether policy recommendations  
28 are materially affected.  
29  
30  
31  
32  
33  
34  
35  
36  
37  
38  
39  
40  
41  
42

### 43 **Conclusion and recommendation**

44  
45 In summary, the evidence suggests that despite the incorporation of more detailed methods and  
46  
47 processes over the past decade, the time it has taken NICE to produce guidance over the past  
48  
49 decade has not independently increased. The introduction of the STA process has resulted in  
50  
51 the production of significantly faster guidance to the NHS, irrespective of clinical topic.  
52  
53

54 However, appeals when they occur can significantly extend this time. We therefore recommend  
55  
56  
57  
58  
59  
60

1  
2  
3  
4  
5  
6  
7  
8  
9  
10  
11  
12  
13  
14  
15  
16  
17  
18  
19  
20  
21  
22  
23  
24  
25  
26  
27  
28  
29  
30  
31  
32  
33  
34  
35  
36  
37  
38  
39  
40  
41  
42  
43  
44  
45  
46  
47  
48  
49  
50  
51  
52  
53  
54  
55  
56  
57  
58  
59  
60

that where possible, efforts be made to develop working practices and processes which can reduce the need for such appeals.

For peer review only

## References

1. National Institute for Health and Clinical Excellence, *Guide to the multiple technology appraisal process*, 2009.
2. Mayor, S., *NICE to issue faster guidance to the NHS*. *BMJ*, 2005. **331**: p. 1101.
3. Haycox, A., *Does 'NICE blight' exist, and if so, why?* *Pharmacoeconomics*. *Pharmacoeconomics*, 2008. **26**: p. 987-989.
4. NICE, *Guide to the single technology appraisal process*, 2009, National Institute for Health and Clinical Excellence,.
5. Wailoo, A. and C. Pickstone, *A Review Of The Nice Single Technology Appraisal Process*, 2008, School of Health and Related Research, University of Sheffield (Decision Support Unit),.
6. National Institute for Health and Clinical Excellence, *Guide to the single technology appraisal process*, 2009.
7. Barham, L., *Single Technology Appraisals by NICE -- are they delivering faster guidance to the NHS?* *Pharmacoeconomics*, 2008. **26**: p. 1037-43.
8. Ford, J.A., et al., *NICE guidance: a comparative study of the introduction of the single technology appraisal process and comparison with guidance from Scottish Medicines Consortium*. *BMJ Open*, 2012. **2**(1).
9. O'Neill, P., N. Devlin, and Puig-Peró, *Time trends in NICE HTA decisions*, in *Consulting report 2012*, Office of Health Economics: London.
10. National Institute for Health and Clinical Excellence. *Guidance on the use of vinorelbine for the treatment of advanced breast cancer*. Technology Appraisal Guidance 2002 01/01/2012]; Available from: <http://guidance.nice.org.uk/TA54>.
11. Miners AH, Garau M, Fidan D, Fischer AJ. Comparing estimates of cost effectiveness submitted to the National Institute for Clinical Excellence (NICE) by different organisations: retrospective study. *BMJ*, 2005. 330:65.

## Tables

Table 1: Appraisals included in the analysis (n=196)

| Variable                     | STA | MTA |
|------------------------------|-----|-----|
| n                            | 80  | 116 |
| Guidance published*          | 39  | 97  |
| Appraisal suspended*         | 8   | 14  |
| Appraisal of a drug or drugs | 79  | 73  |
| Appraisal cancer-related     | 47  | 29  |
| At least one appeal**        | 9   | 36  |
| Review                       | 3   | 26  |

\*at the time the analysis was undertaken

\*\*appeals are made by consultees (often the producer of the technology) against final appraisal determinations, that is, NICE's provisional guidance. See XX for further details.



Table 2. Results of Kaplan Meier analysis (weeks), log-rank tests of equality of survivor functions

| Strata            | MTA n=116 |                       |         | STA n=80 |                      |         |
|-------------------|-----------|-----------------------|---------|----------|----------------------|---------|
|                   | N         | Median (IQR)          | p-value | N        | Median (IQR)         | p-value |
| <b>Cancer</b>     | 23        | 66.5 (60.6 to 111.1)  |         | 18       | 57.0 (42.3 to 87.9)  |         |
| <b>No Cancer</b>  | 74        | 74.0 (61.4 to 116.1)  | 0.43    | 21       | 45.4 (44.7 to 55.7)  | 0.02    |
| <b>Review</b>     | 17        | 68.4 (61.4 to 111.1)  |         | 1        | 44.1 (N/A)           |         |
| <b>Non review</b> | 80        | 74.0 (60.9 to 116.4)  | 0.65    | 38       | 51.0 (44.7 to 75.4)  | 0.18    |
| <b>Drug</b>       | 59        | 77.6 (62.4 to 116.3)  |         | 39       | 48.0 (44.3 to 75.4)  |         |
| <b>Non drug</b>   | 38        | 66.6 (57.7 to 91.8)   | 0.11    | 0        | N/A                  | -       |
| <b>Appeal*</b>    | 35        | 116.1 (91.9 to 136.9) |         | 7        | 76.7 (65.0 to 105.3) |         |
| <b>No appeal</b>  | 62        | 61.6 (57.7 to 71.1)   | <0.001  | 32       | 44.9 (42.3 to 48.0)  | <0.001  |

\*Indicates at least one appeal; IQR, interquartile range; N indicates observed events; N/A, not applicable

Table 3: Results from the loglogistic modelling

| Variable               | Coefficient | 95% CI         | p-value | Marginal effect<br>(weeks) <sup>†</sup> | 95% CI           |
|------------------------|-------------|----------------|---------|-----------------------------------------|------------------|
| <b>STA*</b>            | -0.49       | -0.62 to -0.36 | <0.001  | -36.2                                   | -46.05 to -26.42 |
| <b>Cancer*</b>         | -0.03       | -0.002 to 0.04 | 0.60    | -2.06                                   | -9.80 to 5.70    |
| <b>STA x cancer</b>    | 0.13        | -0.05 to 0.30  | 0.15    | 9.23                                    | -3.36 to 21.81   |
| <b>Drug*</b>           | 0.08        | -0.01 to 0.20  | 0.08    | 6.10                                    | -0.75 to 12.87   |
| <b>Review*</b>         | -0.04       | -0.12 to 0.07  | 0.43    | -3.26                                   | -11.39 to 4.87   |
| <b>Ever an appeal*</b> | 0.60        | 0.50 to 0.67   | <0.001  | 42.83                                   | 35.50 to 50.17   |
| <b>Year started**</b>  | 0.02        | -0.002 to 0.04 | 0.073   | 1.40                                    | -0.35 to 2.94    |
| <b>Ln_gamma</b>        | -2.06       | -2.20 to -1.91 | <0.001  | -                                       | -                |

Log likelihood = 2.23; constant = 4.04; \*yes = 1, no =0; \*\*where values range between (20)1 and (20)10;

\*indicates the independent contribution to the median to time to publication;  $\beta$  values less than 0 indicate variables are associated with a shorter time to guidance; CI – confidence interval

## Figures

Figure 1. Kaplan-Meier time to event estimate of time to publication of guidance

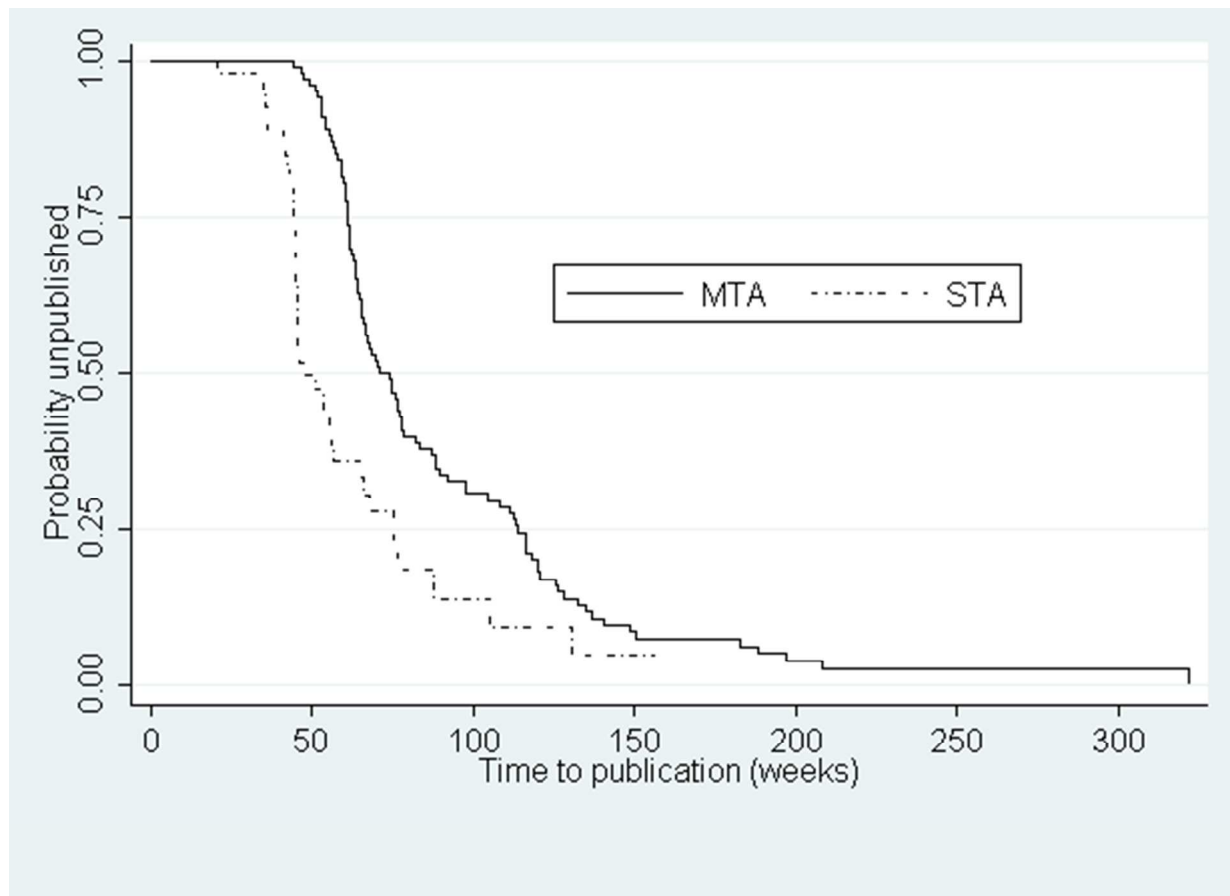

1  
2  
3  
4  
5  
6  
7  
8  
9  
10  
11  
12  
13  
14  
15  
16  
17  
18  
19  
20  
21  
22  
23  
24  
25  
26  
27  
28  
29  
30  
31  
32  
33  
34  
35  
36  
37  
38  
39  
40  
41  
42  
43  
44  
45  
46  
47  
48  
49  
50  
51  
52  
53  
54  
55  
56  
57  
58  
59  
60

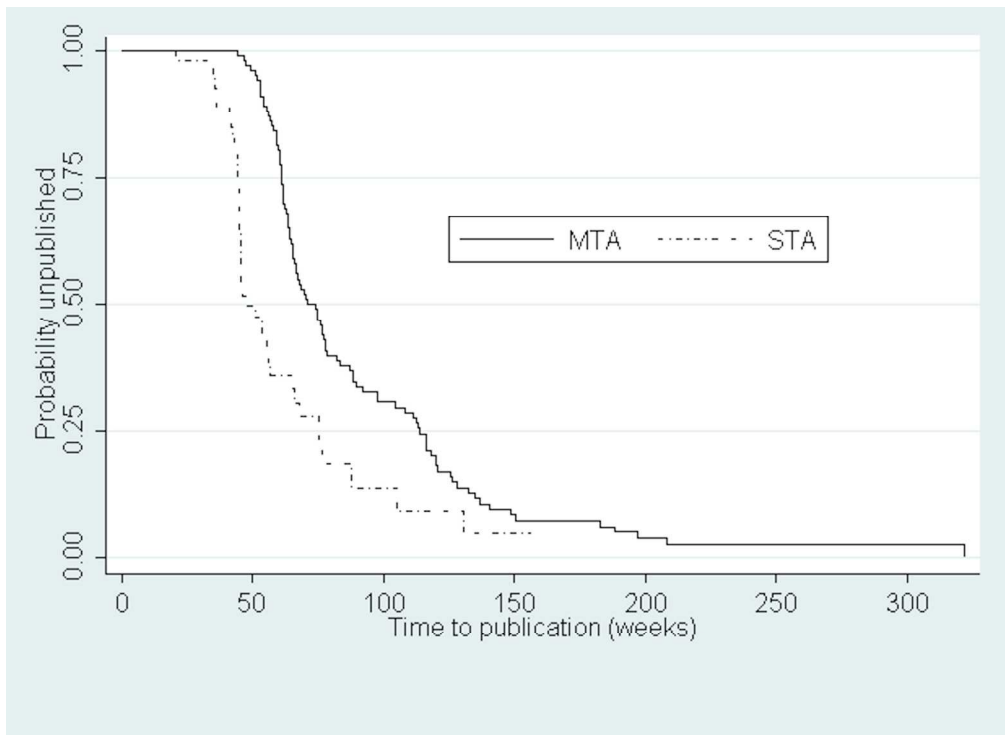

Figure 1. Kaplan-Meier survival estimate of time to publication of guidance.  
217x158mm (300 x 300 DPI)

view only
